# Supplementary material for: Incorporation of Keggin-based H3PW7Mo5O40into bentonite: synthesis, characterization and catalytic applications
Source: Royal Society of Chemistry journal article supplement (doi:10.1039/d1ra01179k), 2021-01-01

## **Incorporation of Keggin-Based $H_3PW_7Mo_5O_{40}$ into Bentonite: Synthesis, Characterization and Catalytic Application**

Dipak S Aher, Kiran R Khillare, Prof. Sunil G Shankarwar \*

Department of Chemistry, Dr. Babasaheb Ambedkar Marathwada University, Aurangabad  
431004, M.S., India; E-mail: shankarwar\_chem@yahoo.com

---

### **Supporting Information**

#### **Content**

|                                                                                               |           |
|-----------------------------------------------------------------------------------------------|-----------|
| <b>1. EDS analysis graph.....</b>                                                             | <b>S1</b> |
| <b>2. Elemental mapping images.....</b>                                                       | <b>S2</b> |
| <b>3. Recovered 20% <math>PW_7Mo_5</math>/Bentonite catalyst.....</b>                         | <b>S3</b> |
| <b>4. Validation of Green metrics for all synthesized compounds 3a-n and 4a-n.....</b>        | <b>S4</b> |
| <b>5. Spectral data of the compounds.....</b>                                                 | <b>S5</b> |
| <b>6. FT-IR, <math>^1H</math> &amp; <math>^{13}C</math> NMR spectra of the compounds.....</b> | <b>S6</b> |

S1. EDS analysis graph:

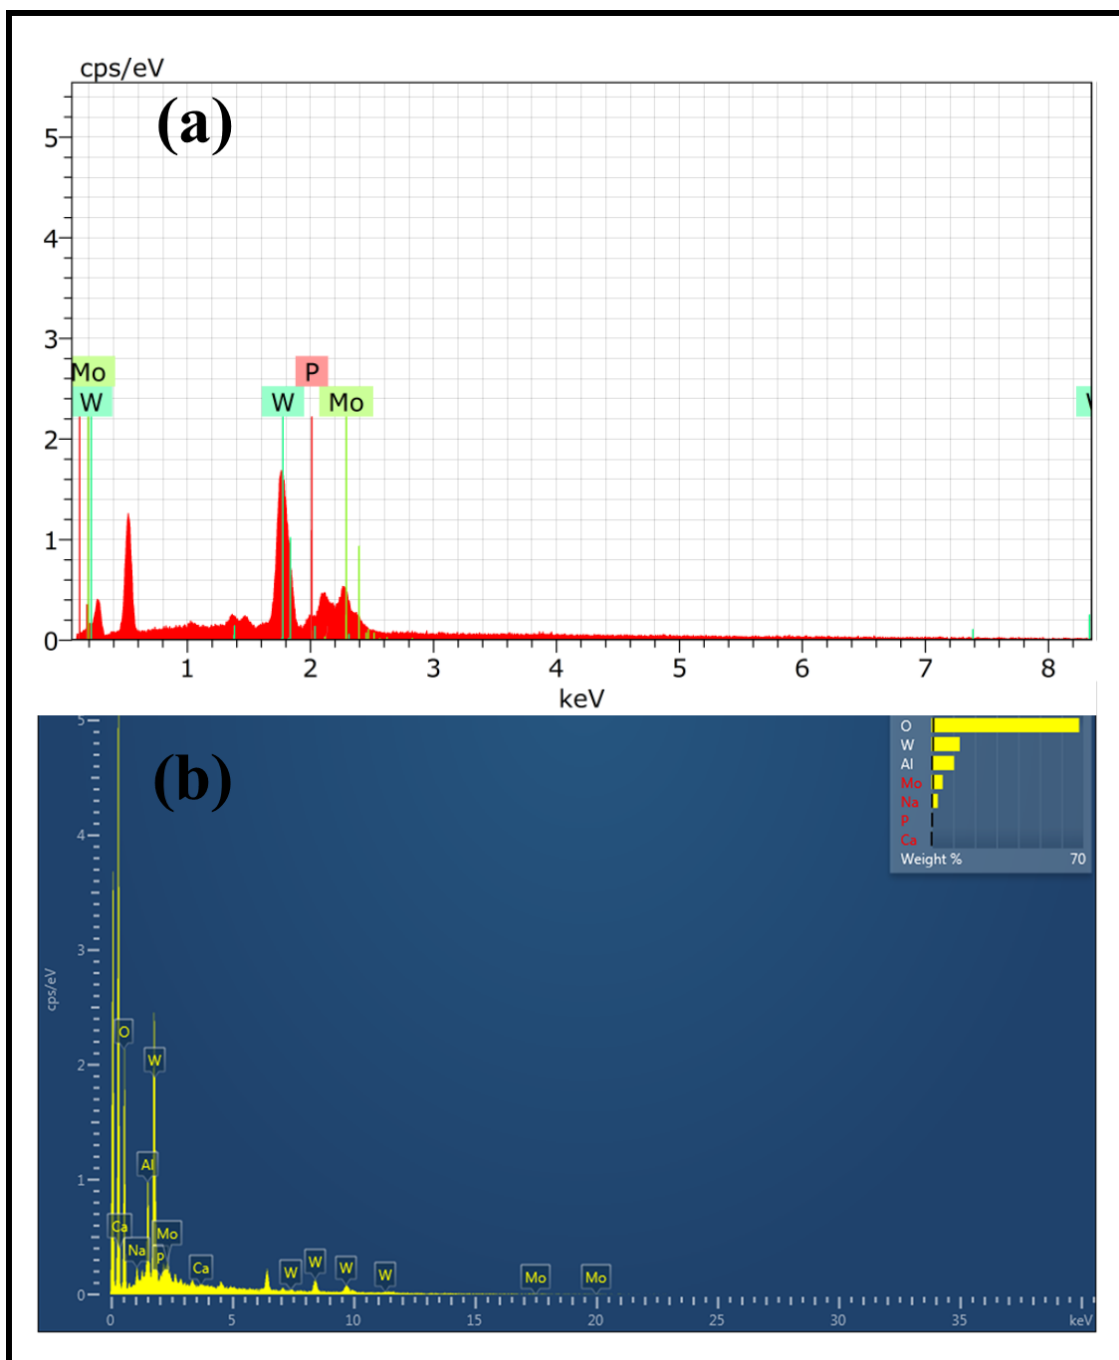

Figure 1. EDS of (a) bulk  $PW_7Mo_5$  (b) 20%  $PW_7Mo_5$ /Bentonite catalyst.

## S2. Elemental mapping images:

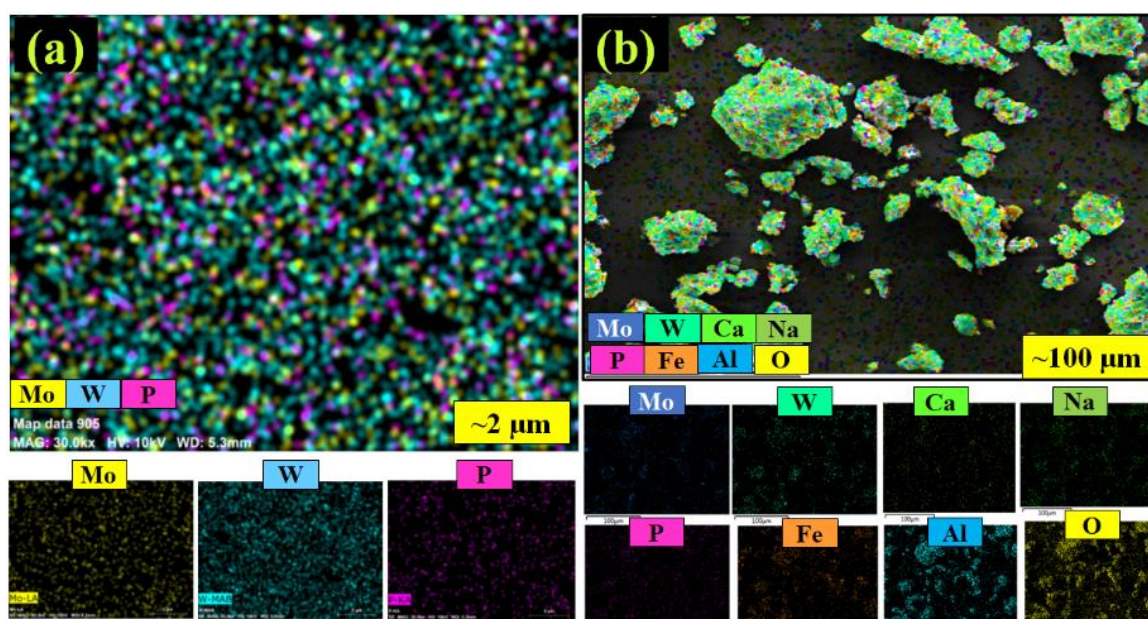

Figure 2. Elemental mapping images of (a) bulk  $PW_7Mo_5$  (b) 20%  $PW_7Mo_5$ /Bentonite catalyst.

## S3. Recovered 20% $PW_7Mo_5$ /Bentonite catalyst.

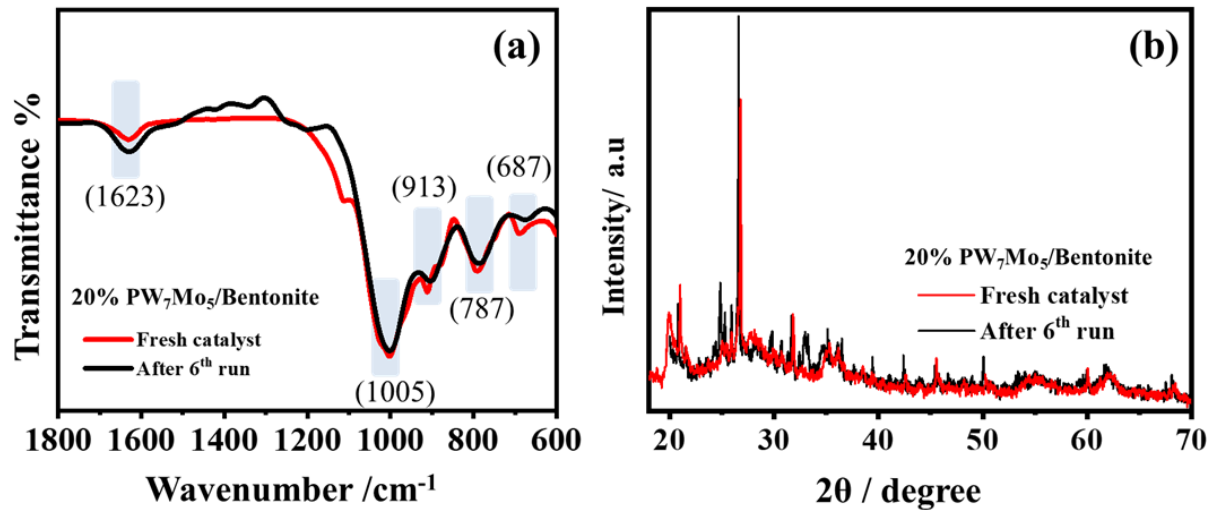

Figure 3. FT-IR (a) and XRD (b) analysis of recovered 20%  $PW_7Mo_5$ /Bentonite catalyst.

#### S4. Validation of Green metrics for all synthesized compounds (3a-n & 4a-n)

##### Calculation of green metrics:

Materials used for green metrics calculation:

**Reactant 1:** Benzaldehyde 0.31 gm (Mol. Wt. = 106.12), 4-Chlorobenzaldehyde 0.42 gm (Mol. Wt = 140.56), 4-Nitrobenzaldehyde 0.45 gm (Mol. Wt. = 151.12), 4-Bromobenzaldehyde 0.55 gm (Mol. Wt. = 185.02), 4-Fluorobenzaldehyde 0.37 gm (Mol. Wt. = 124.11), 3-Nitrobenzaldehyde 0.45 gm (Mol. Wt. = 151.12), 4-Anisaldehyde 0.40 gm (Mol. Wt. = 136.15), 4-Methylbenzaldehyde 0.36 (Mol. Wt. = 120.14), 3-Chloro-4-Fluorobenzaldehyde 0.47 gm (Mol. Wt. = 158.56), 3-Bromobenzaldehyde 0.55 gm (Mol. Wt. = 185.02), 4-Hydroxybenzaldehyde 0.36 gm (Mol. Wt. = 122.12), 3-Chlorobenzaldehyde 0.42 gm (Mol. Wt. = 140.56), Salicylaldehyde 0.36 gm (Mol. Wt. = 122.12), Furfural 0.28 gm (Mol. Wt. = 96.09). 2-Chlorobenzaldehyde 0.42 gm (Mol. Wt. = 140.56). **Reactant 2:** 5, 5-dimethyl-1, 3-cyclohexanedione 0.84 gm (Mol. Wt. = 140.18). **Reactant 3:** Ammonium acetate 0.23 gm (Mol. Wt. = 77.08).

##### Analysis of green metrics:

The following listed formulae were used for calculating E-factor, Atom economy (AE), Reaction mass efficiency (RME), Effective mass yield (EMY), and Optimum efficiency (OE). The Calculated data for compounds 3(a-n) and 4(a-n) are presented in Table 1.

##### Calculation of green chemistry metrics for one representative entry, viz. 3a

**## E-factor** = Total mass waste (g) / Mass of product

$$= \text{Total input (g)} - \text{Total output (g)} / \text{Total output (g)}$$

e.g. For the product **3a**; E-factor = (0.31 gm + 0.84 gm) – 0.959 / 0.959 = 0.19

**## Atom Economy (AE) (%)** = (Molecular wt. of product) / (Total molecular wt. of reactants) x 100

e.g. For the product **3a**; AE = (350.46) / (106.12 + (2 x 140.18 )) x 100 = 90.67 %

**##RME (%)** = (Mass of isolated product) / (Total mass of reactant) x 100

e.g. For the product **3a**;  $RME = (0.959) / (0.31 \text{ gm} + 0.84 \text{ gm}) \times 100 = 83.39$

**##EMY (%)** = (Mass of Product)/ (Mass of non-benign reagents) x 100

e.g. For the product **3a**;  $EMY = (0.959) / (0.31 \text{ gm} + 0.84 \text{ gm}) \times 100 = 83.39 \%$

**##OE (%)** = RME/ AE x 100

e.g. For the product **3a**;  $OE = (83.39) / (90.67) \times 100 = 91.97 \%$

**Table 1. Green metrics calculation:**

| Entry | Product | E-factor | Atom Economy (AE) | Reaction Mass Efficiency (RME) % | Effective Mass Yield (EMY) % | Optimum Efficiency (OE) % |
|-------|---------|----------|-------------------|----------------------------------|------------------------------|---------------------------|
| 1.    | 3a      | 0.19     | 90.67             | 83.39                            | 83.39                        | 91.97                     |
| 2.    | 3b      | 0.19     | 91.26             | 83.88                            | 83.88                        | 91.91                     |
| 3.    | 3c      | 0.21     | 91.65             | 82.48                            | 82.48                        | 89.96                     |
| 4.    | 3d      | 0.20     | 92.25             | 83.02                            | 83.02                        | 89.99                     |
| 5.    | 3e      | 0.29     | 91.02             | 77.43                            | 77.43                        | 85.06                     |
| 6.    | 3f      | 0.22     | 91.58             | 81.47                            | 81.47                        | 88.96                     |
| 7.    | 3g      | 0.21     | 91.28             | 82.09                            | 82.09                        | 89.93                     |
| 8.    | 3h      | 0.29     | 90.93             | 77.25                            | 77.25                        | 84.95                     |
| 9.    | 3i      | 0.36     | 91.79             | 73.35                            | 73.35                        | 79.91                     |
| 10.   | 3j      | 0.19     | 92.25             | 83.88                            | 83.88                        | 90.92                     |
| 11.   | 3k      | 0.29     | 91.05             | 77.33                            | 77.33                        | 84.93                     |
| 12.   | 3l      | 0.21     | 91.44             | 82.22                            | 82.22                        | 89.91                     |
| 13.   | 3m      | 0.23     | 91.05             | 80.91                            | 80.91                        | 88.86                     |
| 14.   | 3n      | 0.29     | 90.43             | 77.41                            | 77.41                        | 86.60                     |
| 15.   | 4a      | 0.44     | 75.38             | 69.34                            | 69.34                        | 91.98                     |
| 16.   | 4b      | 0.41     | 77.09             | 67.49                            | 67.49                        | 87.54                     |
| 17.   | 4c      | 0.51     | 77.56             | 65.92                            | 65.92                        | 84.99                     |
| 18.   | 4d      | 0.39     | 78.96             | 71.85                            | 71.85                        | 90.99                     |
| 19.   | 4e      | 0.45     | 77.56             | 69.03                            | 69.03                        | 89.20                     |
| 20.   | 4f      | 0.44     | 76.88             | 69.19                            | 69.19                        | 89.99                     |
| 21.   | 4g      | 0.52     | 77.09             | 65.52                            | 65.52                        | 84.99                     |
| 22.   | 4h      | 0.58     | 78.96             | 63.17                            | 63.17                        | 80.00                     |
| 23.   | 4i      | 0.64     | 76.20             | 60.95                            | 60.95                        | 79.98                     |
| 24.   | 4j      | 0.47     | 76.30             | 67.90                            | 67.90                        | 89.10                     |
| 25.   | 4k      | 0.50     | 76.11             | 66.50                            | 66.50                        | 87.37                     |
| 26.   | 4l      | 0.56     | 77.88             | 63.86                            | 63.86                        | 81.99                     |
| 27.   | 4m      | 0.66     | 76.20             | 60.20                            | 60.20                        | 79.00                     |
| 28.   | 4n      | 0.64     | 77.09             | 60.89                            | 60.89                        | 78.98                     |

**Note:** Since the catalyst was recovered during the reaction, therefore it's used amount is not included in the calculations.

## S5. Spectral data of the compounds:

### ***3,3,6,6-tetramethyl-9-phenyl-3,4,5,6,7,9-hexahydro-1H-xanthene-1,8(2H)-dione (3a).***

IR (ATR,  $\nu$   $\text{cm}^{-1}$ ): 685, 835, 1035, 1242, 1364, 1581, 1664, 2958.  $^1\text{H}$  NMR (400 MHz,  $\text{CDCl}_3$ )  $\delta_{\text{H}}$  (ppm) = 1.09 (s, 6H 2x  $\text{CH}_3$ ), 1.23 (s, 6H 2x  $\text{CH}_3$ ), 2.37 (m, 8H 4x  $\text{CH}_2$ ), 5.54 (s, 1H CH), 7.09 (d,  $J$  = 8.2 Hz, 2H Ar-H), 7.22 (t, 1H Ar-H), 7.26 (t,  $J$  = 8.4 Hz, 2H Ar-H).  $^{13}\text{C}$  NMR (100 MHz,  $\text{CDCl}_3$ )  $\delta_{\text{C}}$  (ppm) = 27.5, 29.8, 31.5, 32.8, 46.5, 47.1, 115.7, 125.9, 126.8, 128.3, 138.1, 189.6, 190.6.

### ***9-(4-chlorophenyl)-3,3,6,6-tetramethyl-3,4,5,6,7,9-hexahydro-1H-xanthene-1,8(2H)-dione (3b).***

IR (ATR,  $\nu$   $\text{cm}^{-1}$ ): 649, 863, 1011, 1091, 1155, 1365, 1576, 1663, 2955.  $^1\text{H}$  NMR (400 MHz,  $\text{CDCl}_3$ )  $\delta_{\text{H}}$  (ppm) = 1.15 (s, 6H 2x  $\text{CH}_3$ ), 1.27 (s, 6H 2x  $\text{CH}_3$ ), 2.57 - 2.27 (m, 8H 4x  $\text{CH}_2$ ), 5.53 (s, 1H CH), 7.07 (d,  $J$  = 8.5 Hz, Ar-H), 7.25 (d,  $J$  = 8.3 Hz, Ar-H).  $^{13}\text{C}$  NMR (100 MHz,  $\text{CDCl}_3$ )  $\delta_{\text{C}}$  (ppm) = 27.4, 29.6, 31.4, 32.4, 46.4, 47.1, 76.7, 77.1, 77.4, 115.3, 128.2, 128.4, 131.6, 136.7, 189.5, 190.6.

### ***3,3,6,6-tetramethyl-9-(4-nitrophenyl)-3,4,5,6,7,9-hexahydro-1H-xanthene-1,8(2H)-dione (3c).***

IR (ATR,  $\nu$   $\text{cm}^{-1}$ ): 677, 843, 1114, 1238, 1342, 1506, 1577, 3200.  $^1\text{H}$  NMR (400 MHz,  $\text{CDCl}_3$ )  $\delta_{\text{H}}$  (ppm) = 1.12 (s, 6H 2x  $\text{CH}_3$ ), 1.24 (s, 6H 2x  $\text{CH}_3$ ), 2.55 - 2.30 (m, 8H 4x  $\text{CH}_2$ ), 5.57 (s, 1H CH), 7.40 (d,  $J$  = 8.4 Hz, 2H Ar-H), 8.10 (d,  $J$  = 8.7 Hz, 2H Ar-H).  $^{13}\text{C}$  NMR (100 MHz,  $\text{CDCl}_3$ )  $\delta_{\text{C}}$  (ppm) = 27.5, 29.5, 31.5, 33.3, 46.4, 47.0, 76.7, 77.0, 77.3, 114.9, 123.5, 127.6, 146.2, 189.6, 190.9.

### ***3,3,6,6-tetramethyl-9-(3-nitrophenyl)-3,4,5,6,7,9-hexahydro-1H-xanthene-1,8(2H)-dione (3f).***

IR (ATR,  $\nu$   $\text{cm}^{-1}$ ): 652, 801, 1042, 1148, 1351, 1580, 1661, 2954.  $^1\text{H}$  NMR (400 MHz,  $\text{CDCl}_3$ )  $\delta_{\text{H}}$  (ppm) = 1.12 (s, 6 H 2x  $\text{CH}_3$ ), 1.27 (s, 6H 2x  $\text{CH}_3$ ), 2.48 - 2.36 (m, 8H 4x  $\text{CH}_2$ ), 5.54 (s, 1 H CH), 7.49 - 7.35 (m, 2H Ar-H), 8.00 (dt, 1H Ar-H),  $\delta$  8.07-8.02 (s, 1H Ar-H).  $^{13}\text{C}$  NMR (100 MHz,  $\text{CDCl}_3$ )  $\delta_{\text{C}}$  (ppm) = 27.4, 28.8, 31.5, 32.9, 46.1, 47.1, 114.9, 121.1, 122.3, 129.2, 133.0, 140.7, 148.5, 189.7, 191.2.

### ***9-(3-bromophenyl)-3,3,6,6-tetramethyl-3,4,5,6,7,9-hexahydro-1H-xanthene-1,8(2H)-dione (3j).***

IR (ATR,  $\nu$   $\text{cm}^{-1}$ ): 664, 785, 1033, 1244, 1366, 1581, 2952.  $^1\text{H}$  NMR (400 MHz,  $\text{CDCl}_3$ )  $\delta_{\text{H}}$  (ppm) = 1.05 (s, 6H 2x  $\text{CH}_3$ ), 1.18 (s, 6H 2x  $\text{CH}_3$ ), 2.53 - 2.25 (m, 8H 4x  $\text{CH}_2$ ), 5.49 (s, 1H CH), 7.07 (t,  $J$  = 8.0 Hz, 1H Ar-H), 7.14 (t,  $J$  = 8.0 Hz, 1H Ar-H), 7.23 (d,  $J$  = 7.6 Hz, 1H Ar-H), 7.33 (s, 1H Ar-H).  $^{13}\text{C}$  NMR (100 MHz,  $\text{CDCl}_3$ )  $\delta_{\text{C}}$  (ppm) = 27.4, 29.7, 31.5, 32.7, 47.1, 115.1, 122.6, 125.5, 129.0, 130.2, 140.8, 189.5, 190.7, 207.1.

***9-(3-chlorophenyl)-3,3,6,6-tetramethyl-3,4,5,6,7,9-hexahydro-1H-xanthene-1,8(2H)-dione (3l).***

IR (ATR,  $\nu$   $\text{cm}^{-1}$ ): 666, 787, 869, 1034, 1244, 1367, 1581, 1666, 2953.  $^1\text{H}$  NMR (400 MHz,  $\text{CDCl}_3$ )  $\delta_{\text{H}}$  (ppm) = 1.10 (s, 6 H, 2x  $\text{CH}_3$ ), 1.23 (s, 6H, 2x  $\text{CH}_3$ ), 2.45-2.34 (m, 8H 4x  $\text{CH}_2$ ) 5.49 (s, 1H CH), 6.97 (d,  $J$ =7.6 Hz, 1H Ar-H), 7.07 (t, 8Hz 1H Ar-H), 7.23 - 7.12 (m, 2H Ar-H).  $^{13}\text{C}$  NMR (100 MHz,  $\text{CDCl}_3$ )  $\delta_{\text{C}}$  (ppm) = 27.4, 29.6, 31.5, 32.7, 46.4, 47.0, 115.1, 125.0, 126.1, 127.2, 129.4, 134.2, 140.5, 189.5, 190.7.

***3,3,6,6-tetramethyl-9-phenyl-3,4,6,7,9,10-hexahydroacridine-1,8(2H,5H)-dione (4a).***

IR (ATR,  $\nu$   $\text{cm}^{-1}$ ): 661, 833, 1035, 1154, 1237, 1363, 1582, 1630, 2956, 3286.  $^1\text{H}$  NMR (400 MHz,  $\text{CDCl}_3$ )  $\delta_{\text{H}}$  (ppm) = 1.09 (s, 6H, 2x  $\text{CH}_3$ ); 1.24 (s, 6H, 2x  $\text{CH}_3$ ), 2.51 - 2.33 (m, 8H 4x  $\text{CH}_2$ ), 5.55 (s, 1H CH), 7.11 (d,  $J$  = 8.2 Hz, 2H Ar-H), 7.19 (d,  $J$  = 6.9 Hz, 2H Ar-H), 7.26 (s, 1H Ar-H), 7.27 (s, 1H -NH).  $^{13}\text{C}$  NMR (100 MHz,  $\text{CDCl}_3$ )  $\delta_{\text{C}}$  (ppm) = 27.5, 29.8, 31.5, 32.8, 47.1, 115.7, 125.9, 126.8, 128.1, 138.1, 189.5, 190.6.

***9-(4-chlorophenyl)-3,3,6,6-tetramethyl-3,4,6,7,9,10-hexahydroacridine-1,8(2H,5H)-dione (4b).***

IR (ATR,  $\nu$   $\text{cm}^{-1}$ ): 766, 836, 1141, 1215, 1487, 1603, 1645, 2955, 3047, 3351.  $^1\text{H}$  NMR (400 MHz,  $\text{CDCl}_3$ )  $\delta_{\text{H}}$  (ppm) = 0.93 (s, 6H, 2x  $\text{CH}_3$ ), 1.05 (s, 6H, 2x  $\text{CH}_3$ ), 2.34 - 2.13 (m, 8H 4x  $\text{CH}_2$ ), 5.02 (s, 1H CH), 7.14 (d,  $J$  = 8.2 Hz, 2 H), 7.28 - 7.24 (m, 2 H).  $^{13}\text{C}$  NMR (100 MHz,  $\text{CDCl}_3$ )  $\delta_{\text{C}}$  (ppm) = 27.1, 29.6, 31.5, 32.7, 33.4, 40.8, 50.7, 128.3, 128.4, 129.5, 131.7, 196.2.

***3,3,6,6-tetramethyl-9-(4-nitrophenyl)-3,4,6,7,9,10-hexahydroacridine-1,8(2H,5H)-dione (4c).***

IR (ATR,  $\nu$   $\text{cm}^{-1}$ ): 693, 826, 1134, 1251, 1336, 1443, 1515, 1639, 2914, 3376.  $^1\text{H}$  NMR (400 MHz,  $\text{DMSO}-d_6$ )  $\delta_{\text{H}}$  (ppm) = 0.81 (s, 6H 2x  $\text{CH}_3$ ), 0.97 (s, 6H 2x  $\text{CH}_3$ ), 1.94 (d,  $J$  = 6.5 Hz, 2H  $\text{CH}_2$ ), 2.15 (d,  $J$  = 6.5 Hz, 2H  $\text{CH}_2$ ), 2.31 (m, 4H 2x  $\text{CH}_2$ ), 4.87 (s, 1H CH), 7.49 - 7.34 (m, 2H Ar-H), 8.13 - 7.92 (m, 2 H Ar-H), 9.44 (s, 1H -NH).  $^{13}\text{C}$  NMR (100 MHz,  $\text{DMSO}-d_6$ )  $\delta_{\text{C}}$  (ppm) = 27.0, 29.5, 32.7, 34.4, 50.6, 110.9, 123.5, 129.4, 146.0, 150.5, 155.1, 194.9.

***3,3,6,6-tetramethyl-9-(3-nitrophenyl)-3,4,6,7,9,10-hexahydroacridine-1,8(2H,5H)-dione (4e).***

IR (ATR,  $\nu$   $\text{cm}^{-1}$ ): 685, 893, 1135, 1215, 1350, 1478, 1642, 2950, 3178.  $^1\text{H}$  NMR (400 MHz,  $\text{DMSO-}d_6$ )  $\delta_{\text{H}}$  (ppm) = 0.86 (s, 6H 2x  $\text{CH}_3$ ), 1.02 (s, 6H 2x  $\text{CH}_3$ ), 2.02 (br. s., 2H  $\text{CH}_2$ ), 2.19 (br. s., 2H  $\text{CH}_2$ ), 2.39 (br. s., 4H 2x  $\text{CH}_2$ ), 4.93 (br. s., 1H CH), 7.50 (br. s., 1H Ar-H), 7.63 (br. s., 1H Ar-H), 7.97 (br. s., 2H Ar-H), 9.48 (br. s., 1H -NH).  $^{13}\text{C}$  NMR (100 MHz,  $\text{DMSO-}d_6$ )  $\delta_{\text{C}}$  (ppm) = 26.8, 29.5, 32.6, 34.0, 50.5, 111.0, 121.2, 122.5, 129.7, 134.9, 147.8, 149.7, 150.5, 194.9.

***9-(3-chlorophenyl)-3,3,6,6-tetramethyl-3,4,6,7,9,10-hexahydroacridine-1,8(2H,5H)-dione (4g).***

IR (ATR,  $\nu$   $\text{cm}^{-1}$ ): 686, 797, 1136, 1213, 1354, 1592, 1636, 2947, 3058, 3171.  $^1\text{H}$  NMR (400 MHz,  $\text{DMSO-}d_6$ )  $\delta_{\text{H}}$  (ppm) = 0.87 (s, 6H 2x  $\text{CH}_3$ ), 1.01 (s, 6H 2x  $\text{CH}_3$ ), 2.01 (d,  $J$  = 15.3 Hz, 2H  $\text{CH}_2$ ), 2.18 (d,  $J$  = 15.4 Hz, 2H  $\text{CH}_2$ ), 2.44 - 2.27 (m, 4H 2x  $\text{CH}_2$ ), 4.80 (br. s., 1H CH), 7.29 - 6.99 (m, 4H Ar-H), 9.37 (s, 1H -NH).  $^{13}\text{C}$  NMR (100 MHz,  $\text{DMSO-}d_6$ )  $\delta_{\text{C}}$  (ppm) = 26.9, 29.5, 32.6, 33.5, 50.6, 111.3, 126.0, 126.7, 128.1, 130.0, 132.7, 149.9, 150.2, 194.9.

***9-(3-bromophenyl)-3,3,6,6-tetramethyl-3,4,6,7,9,10-hexahydroacridine-1,8(2H,5H)-dione (4h).***

IR (ATR,  $\nu$   $\text{cm}^{-1}$ ): 684, 765, 882, 1009, 1136, 1480, 1602, 1636, 2951, 3054, 3263.  $^1\text{H}$  NMR (400 MHz,  $\text{DMSO-}d_6$ )  $\delta_{\text{H}}$  (ppm) = 0.82 (s, 6H 2x  $\text{CH}_3$ ), 0.96 (s, 6H 2x  $\text{CH}_3$ ), 1.97 (br. s., 2H  $\text{CH}_2$ ), 2.12 (br. s., 2H  $\text{CH}_2$ ), 2.40-2.31 (m 4H 2x  $\text{CH}_2$ ), 4.73 (br. s., 1H CH), 7.25-7.09 (m, 4H Ar-H), 9.34 (s, 1H -NH).  $^{13}\text{C}$  NMR (100 MHz,  $\text{DMSO-}d_6$ )  $\delta_{\text{C}}$  (ppm) = 26.9, 29.6, 32.7, 33.6, 50.6, 111.4, 121.5, 127.1, 128.9, 130.5, 150.2, 194.9.



S6. FT-IR,  $^1\text{H}$  &  $^{13}\text{C}$  NMR spectra of the compounds:

3,3,6,6-tetramethyl-9-phenyl-3,4,5,6,7,9-hexahydro-1H-xanthene-1,8(2H)-dione (3a).

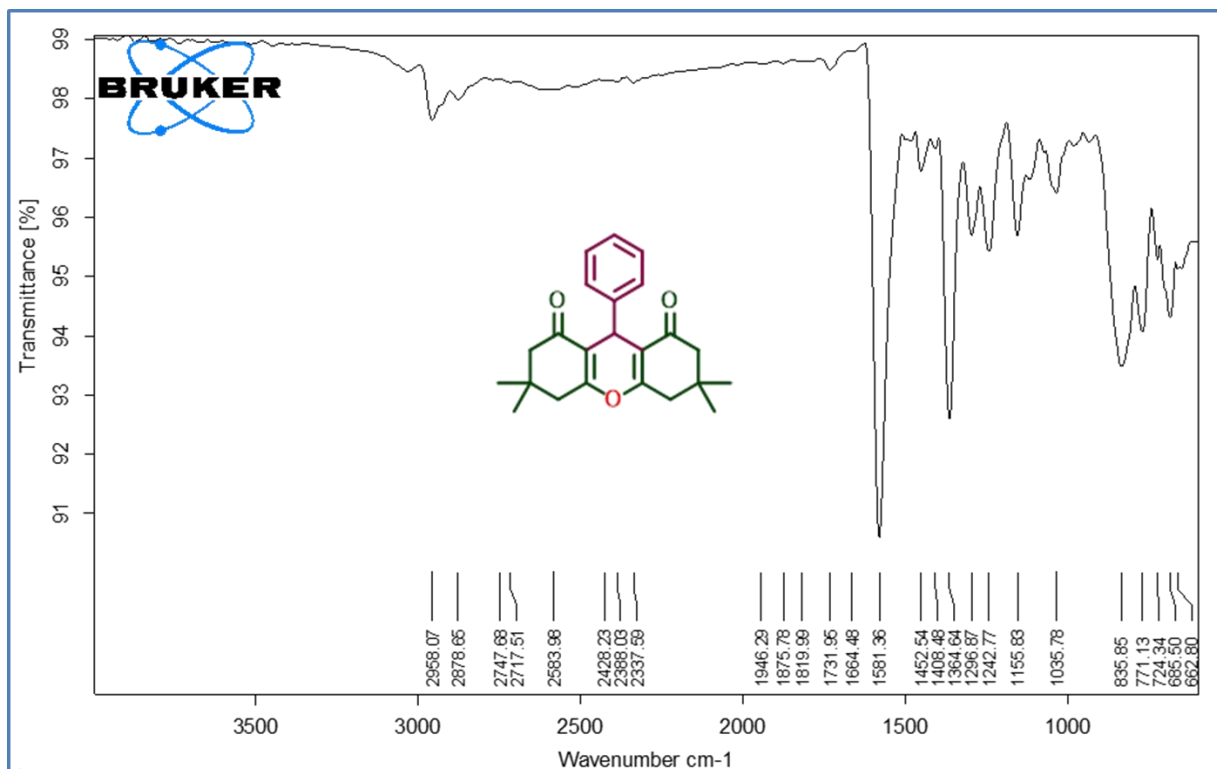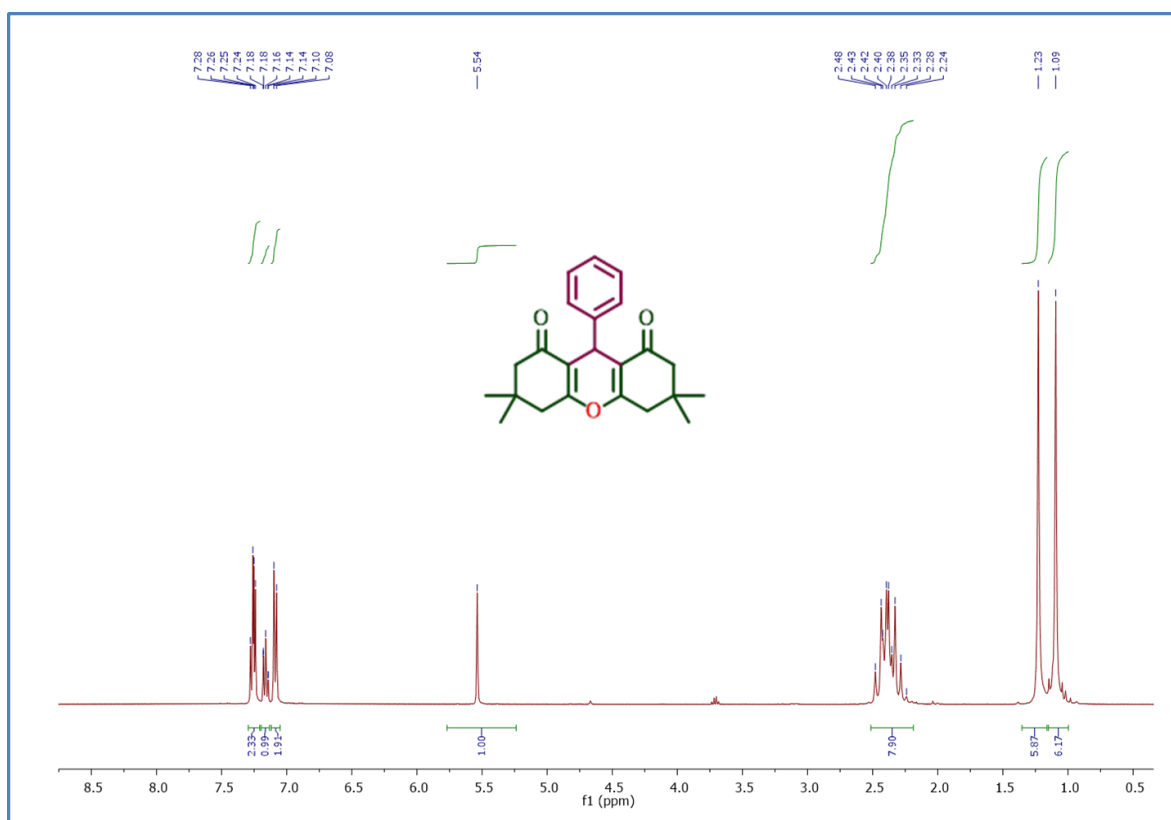

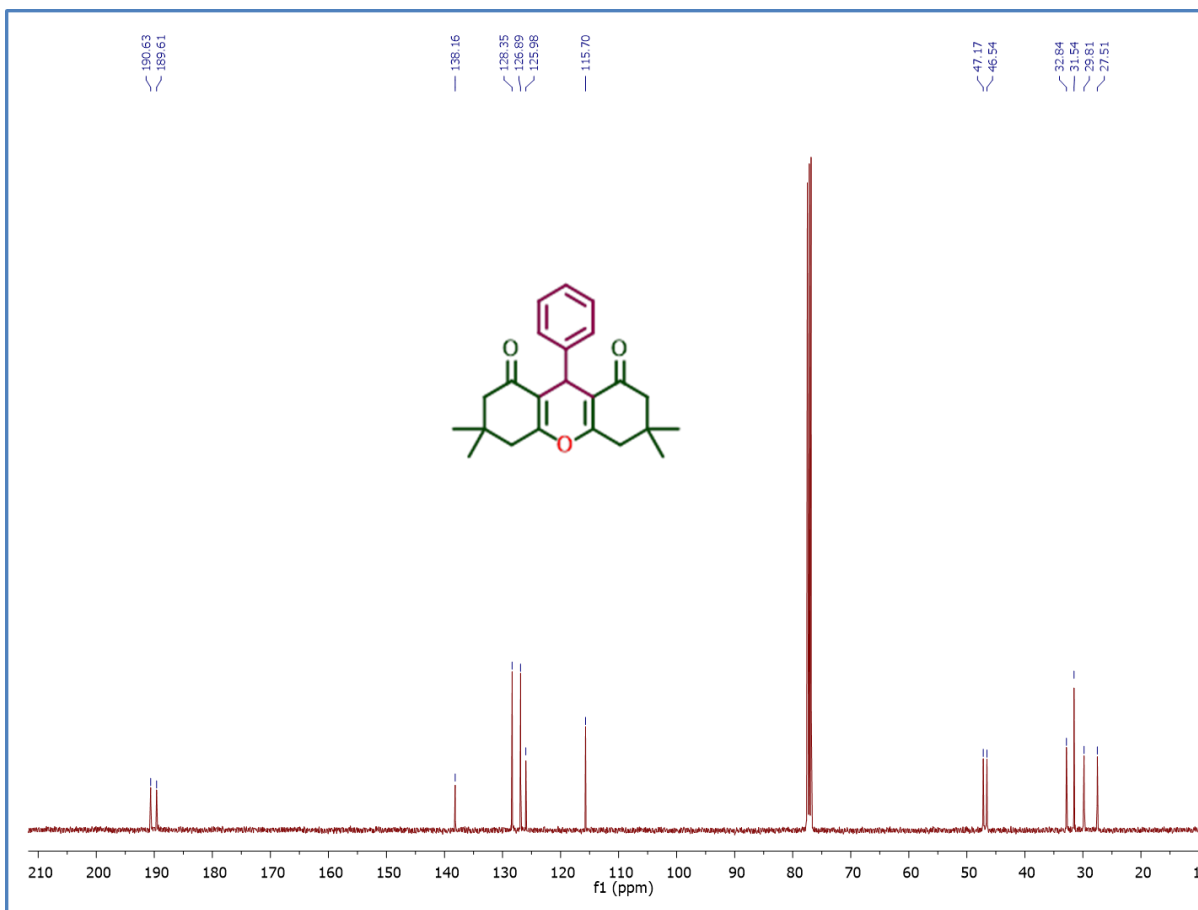

**9-(4-chlorophenyl)-3,3,6,6-tetramethyl-3,4,5,6,7,9-hexahydro-1H-xanthene-1,8(2H)-dione (3b).**

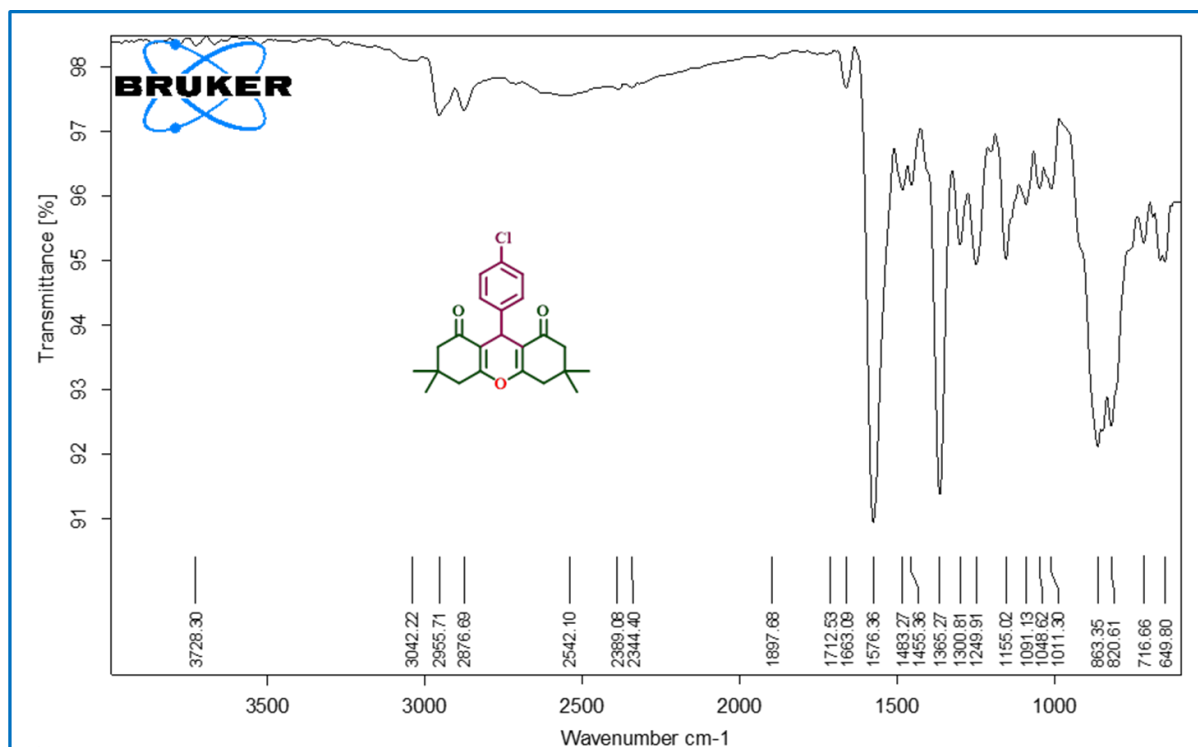

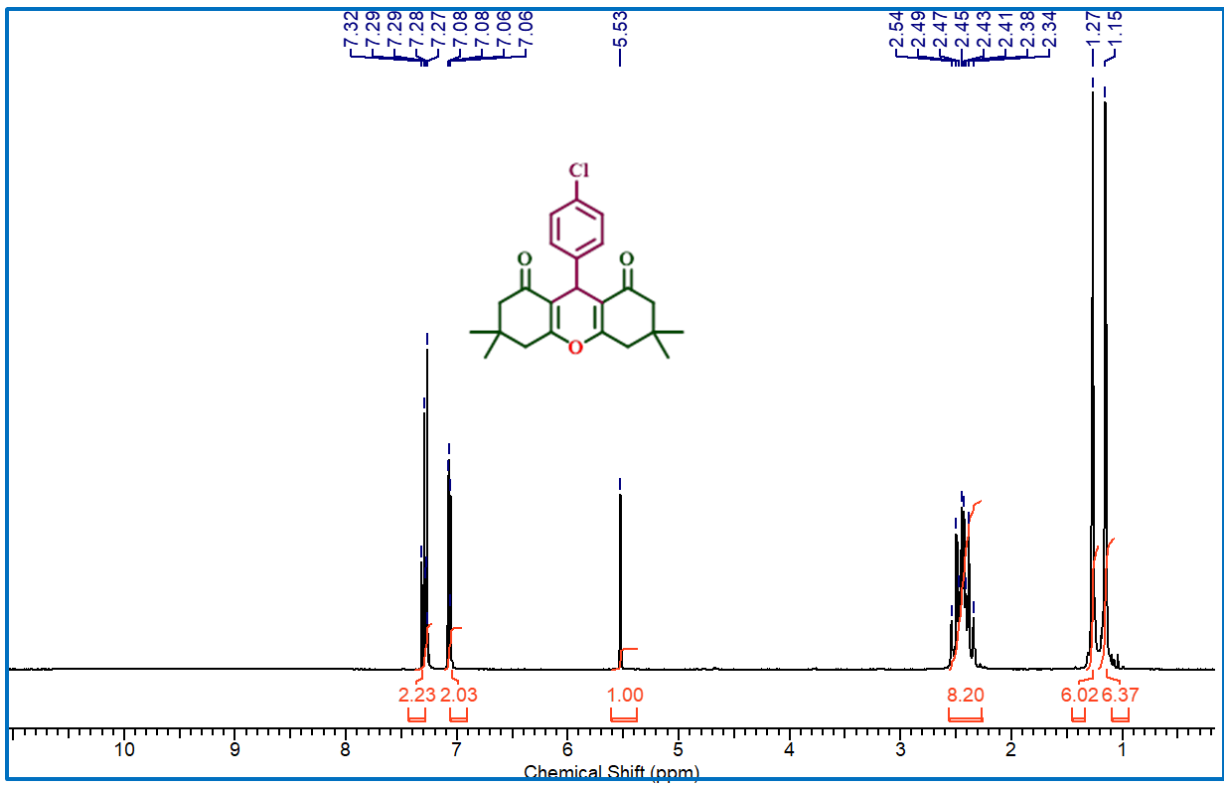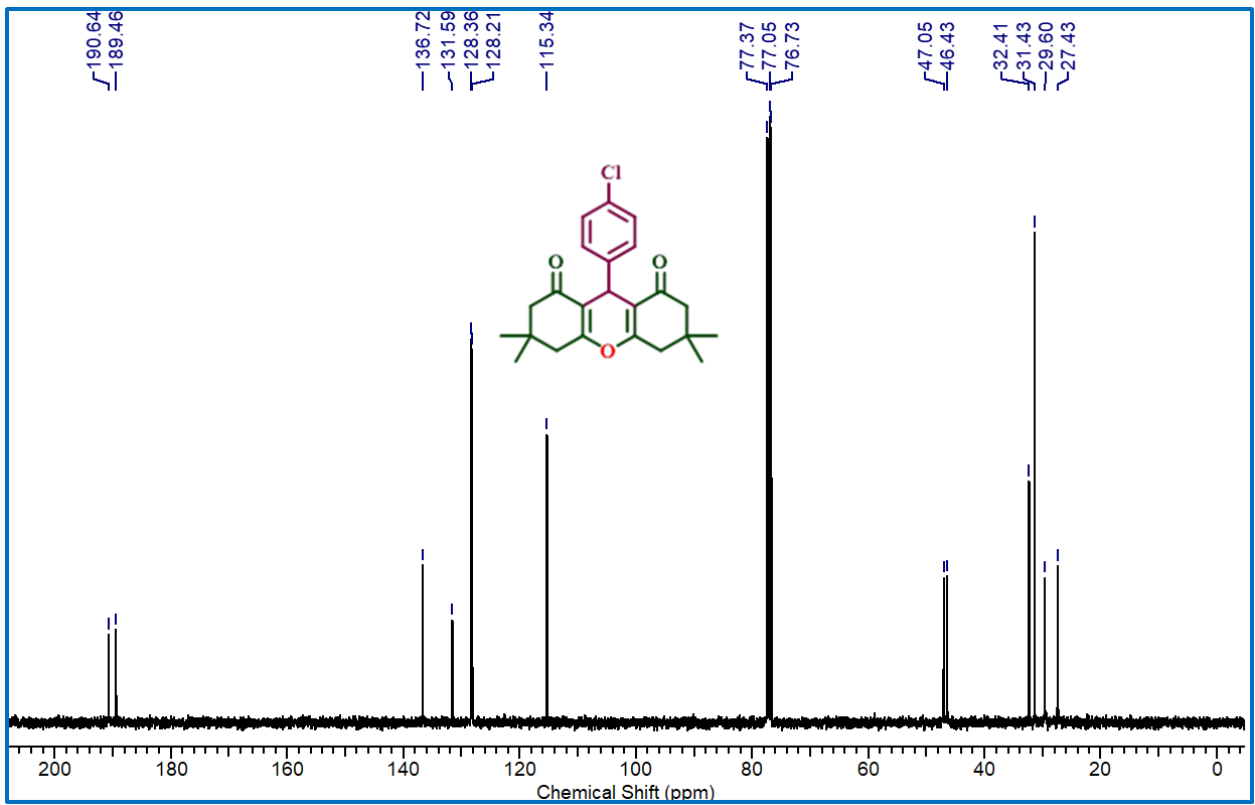

3,3,6,6-tetramethyl-9-(4-nitrophenyl)-3,4,5,6,7,9-hexahydro-1H-xanthene-1,8(2H)-dione

(3c)

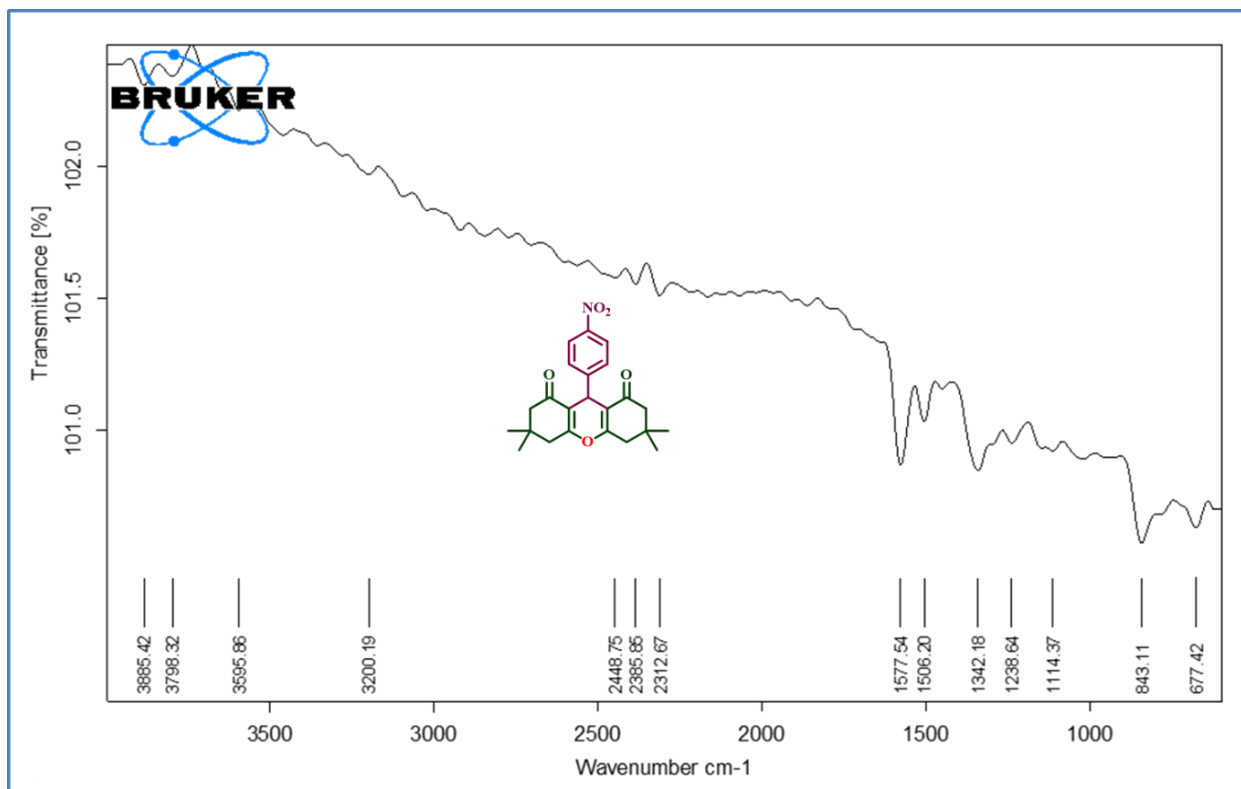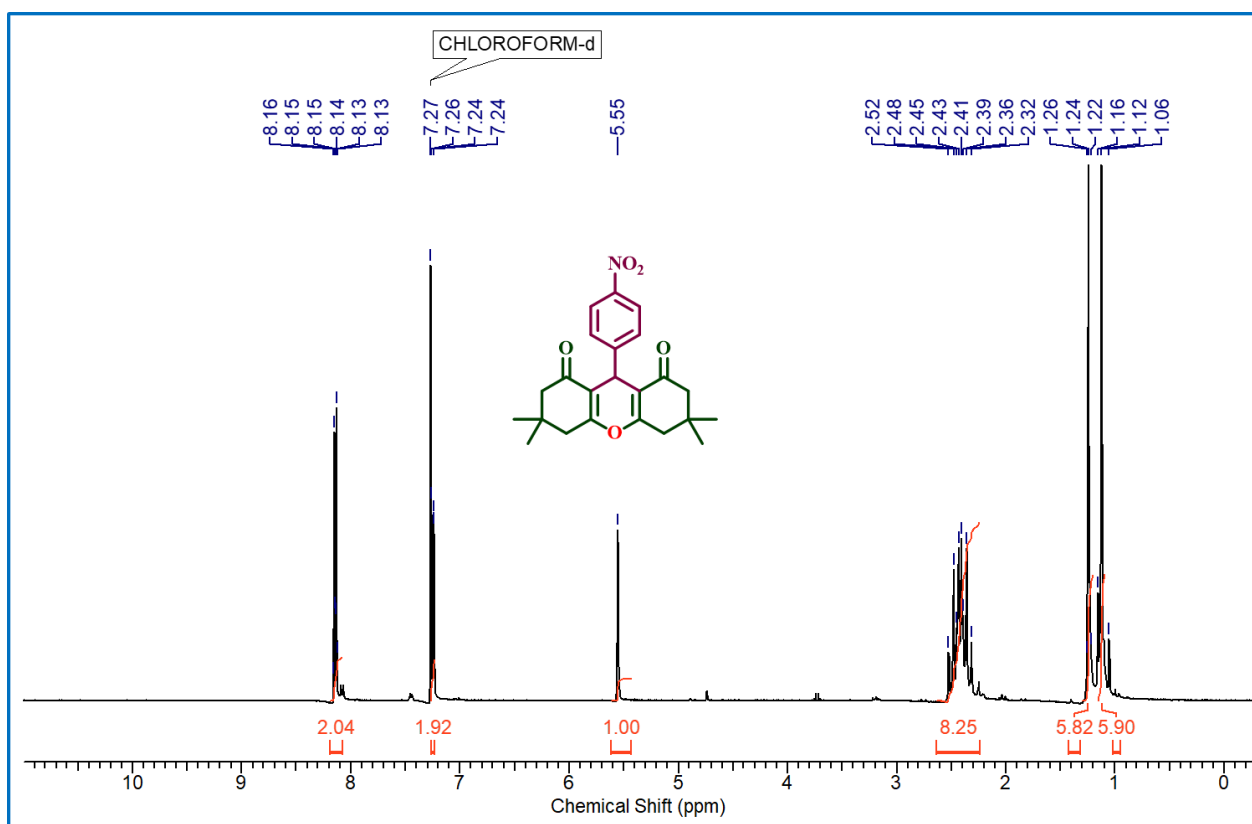

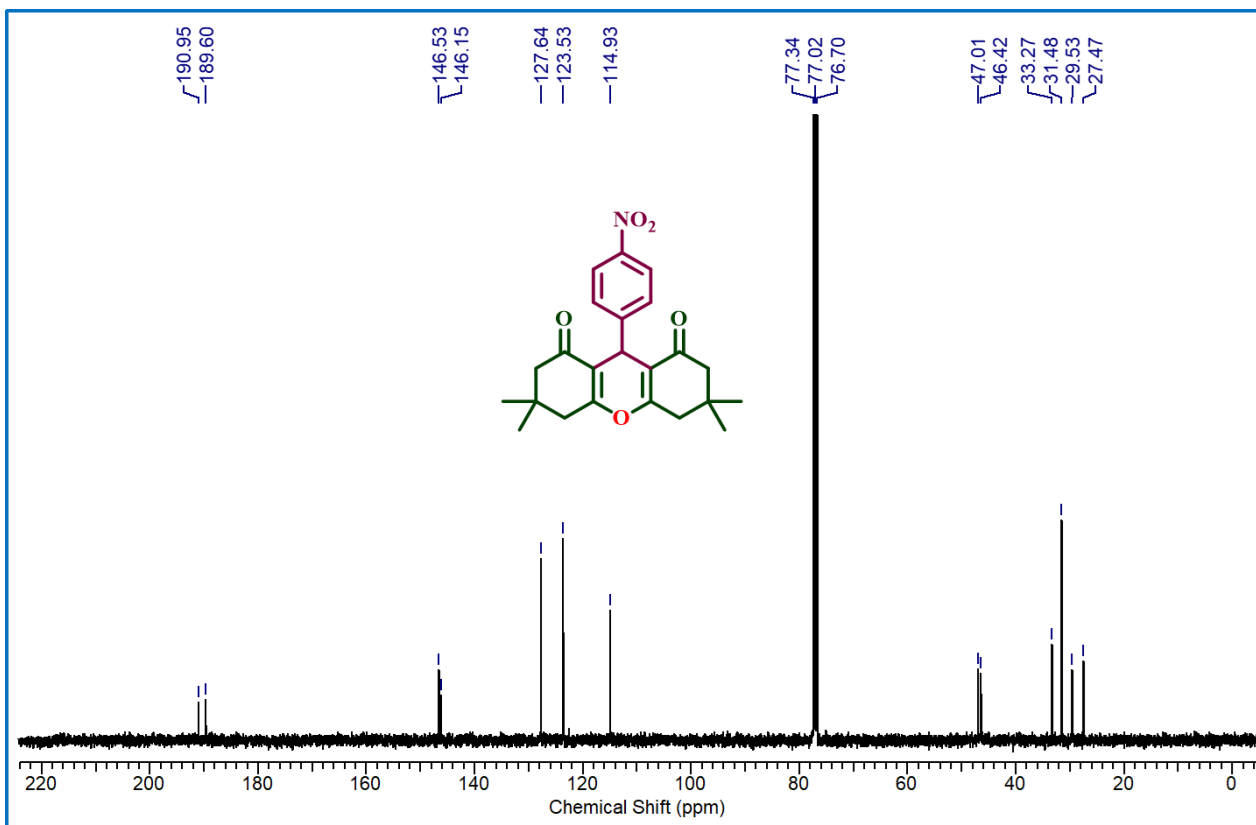

**3,3,6,6-tetramethyl-9-(3-nitrophenyl)-3,4,5,6,7,9-hexahydro-1H-xanthene-1,8(2H)-dione (3f)**

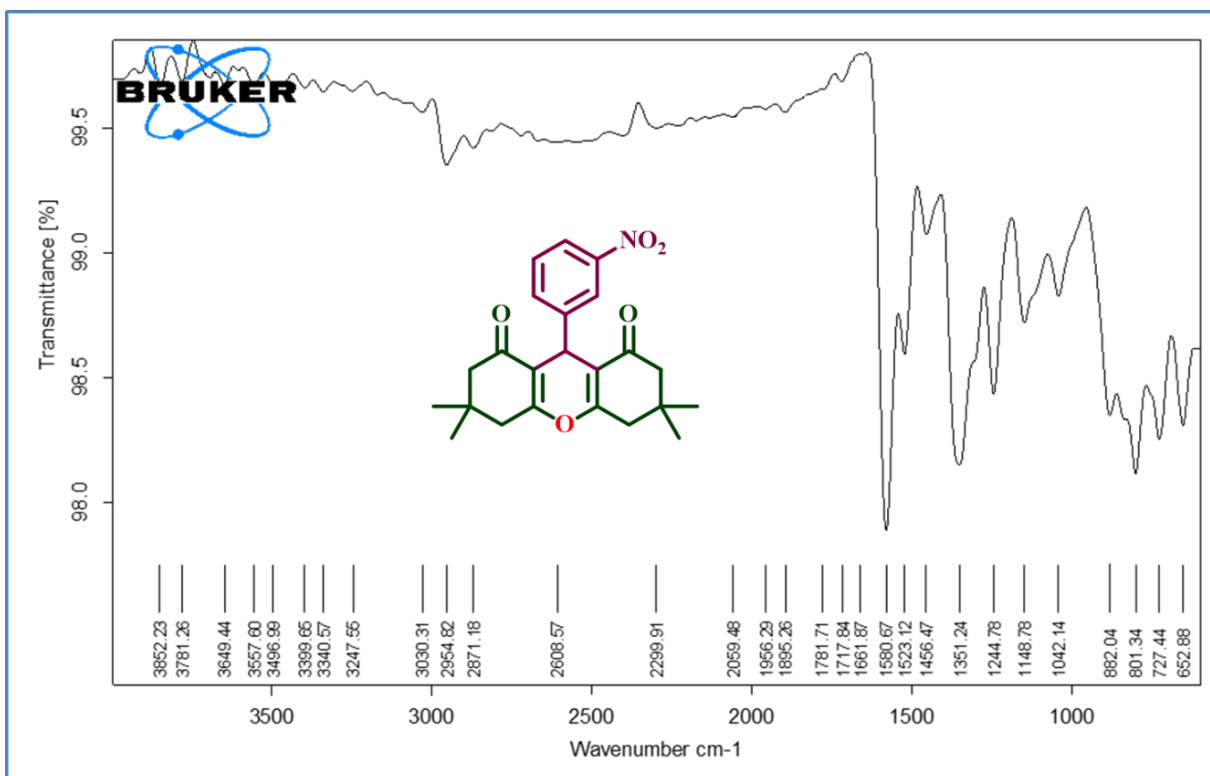

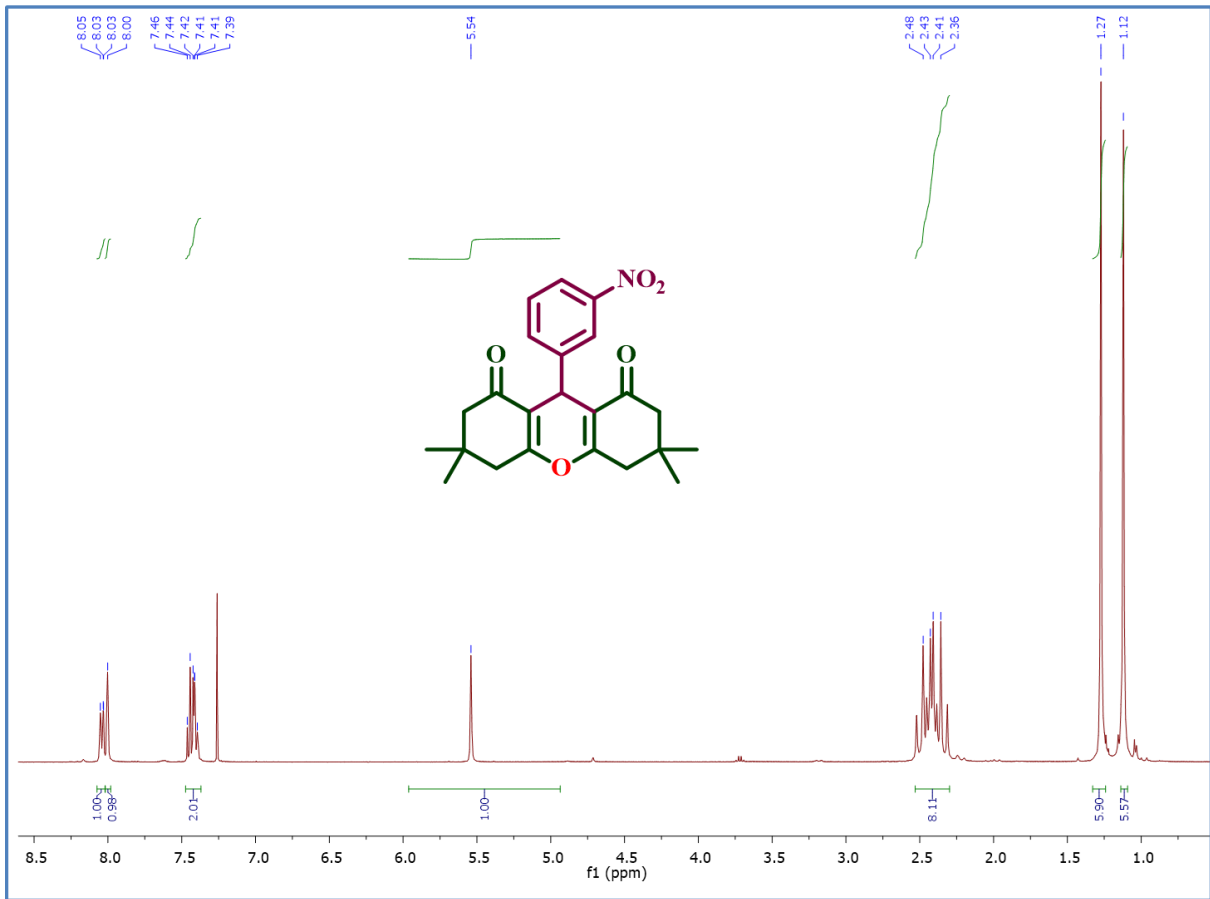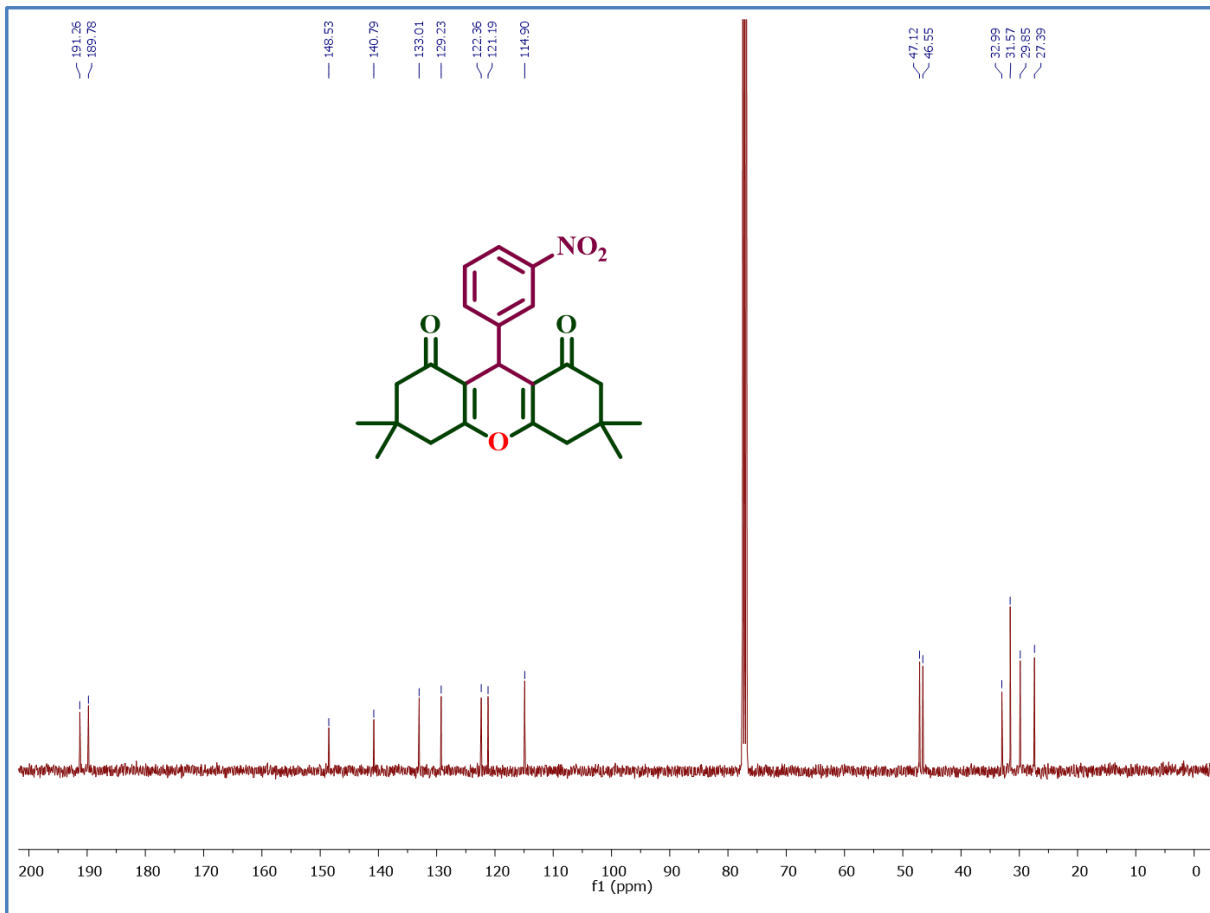

**9-(3-bromophenyl)-3,3,6,6-tetramethyl-3,4,5,6,7,9-hexahydro-1H-xanthene-1,8(2H)-dione (3j).**

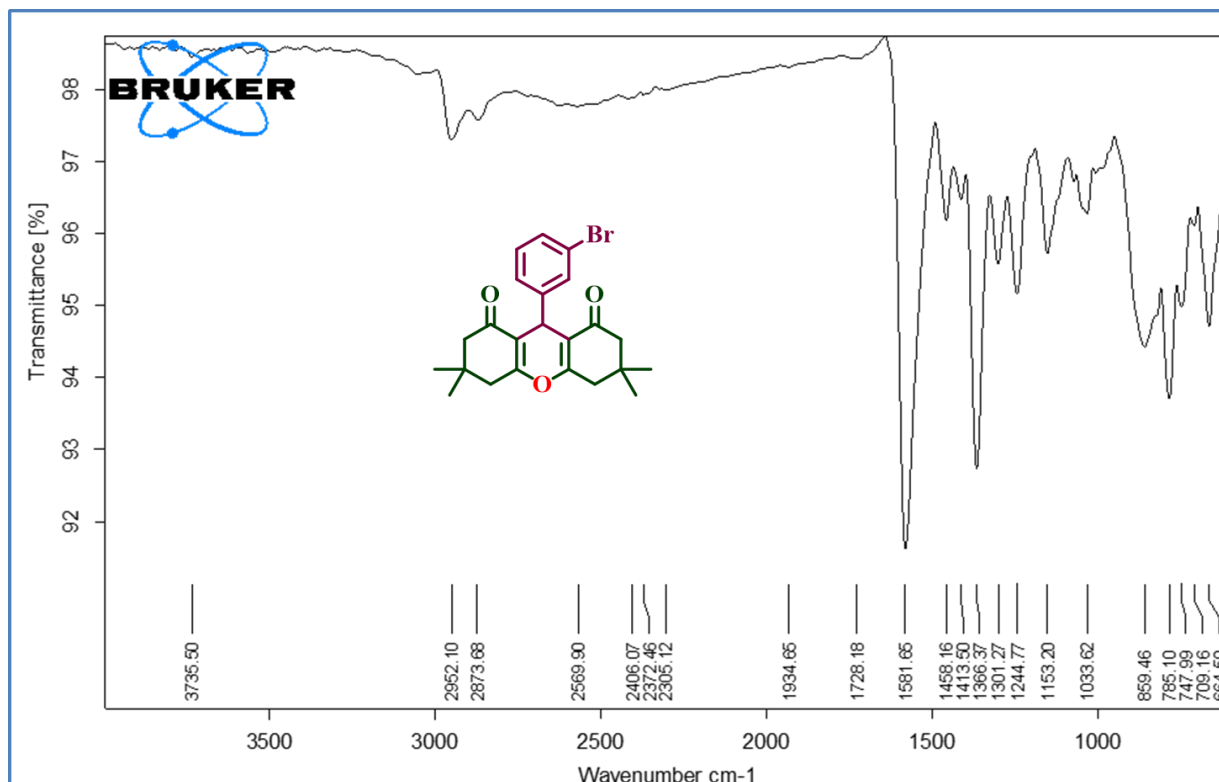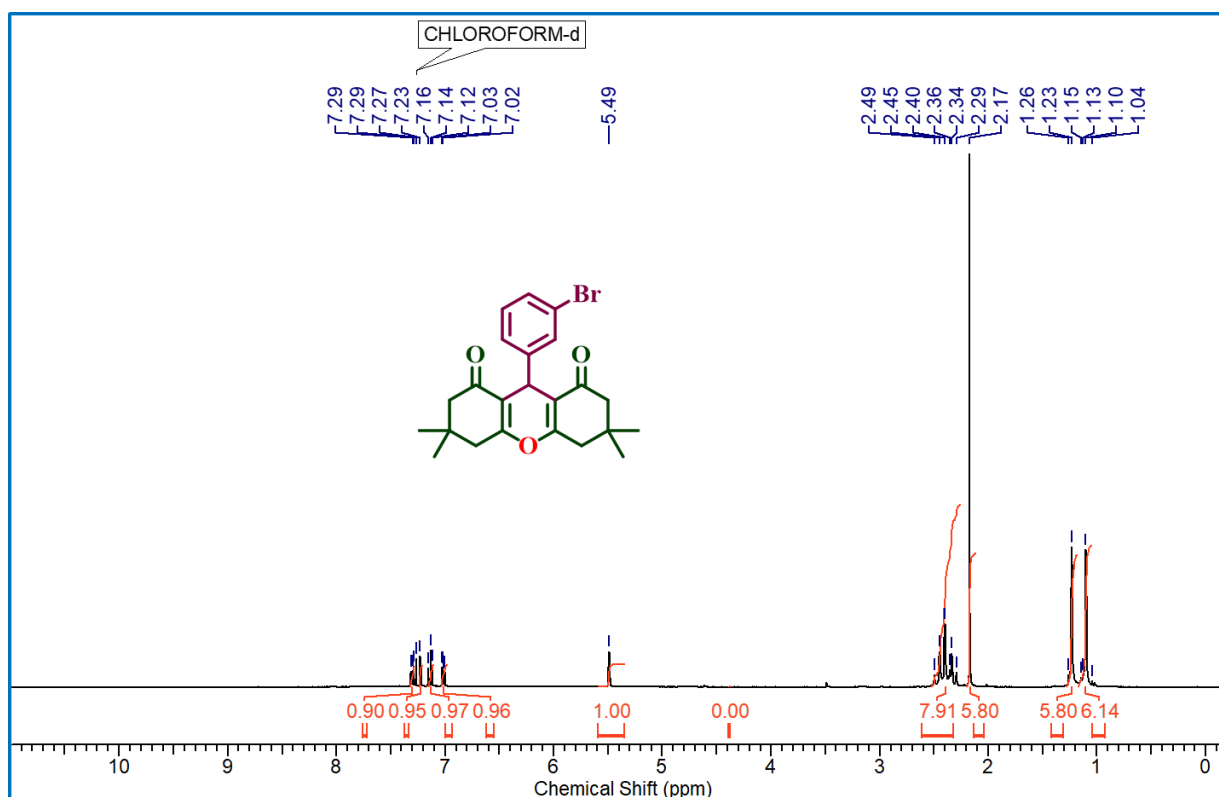

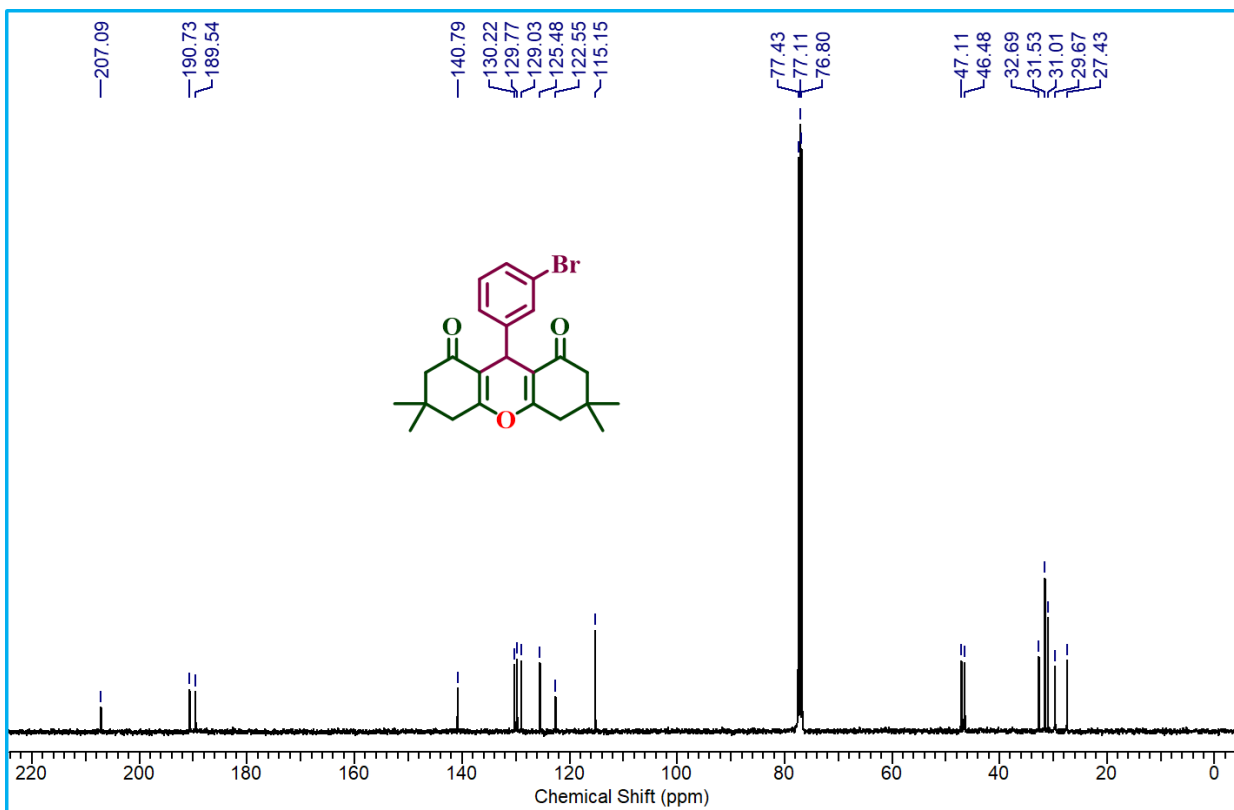

**9-(3-chlorophenyl)-3,3,6,6-tetramethyl-3,4,5,6,7,9-hexahydro-1H-xanthene-1,8(2H)-dione (31).**

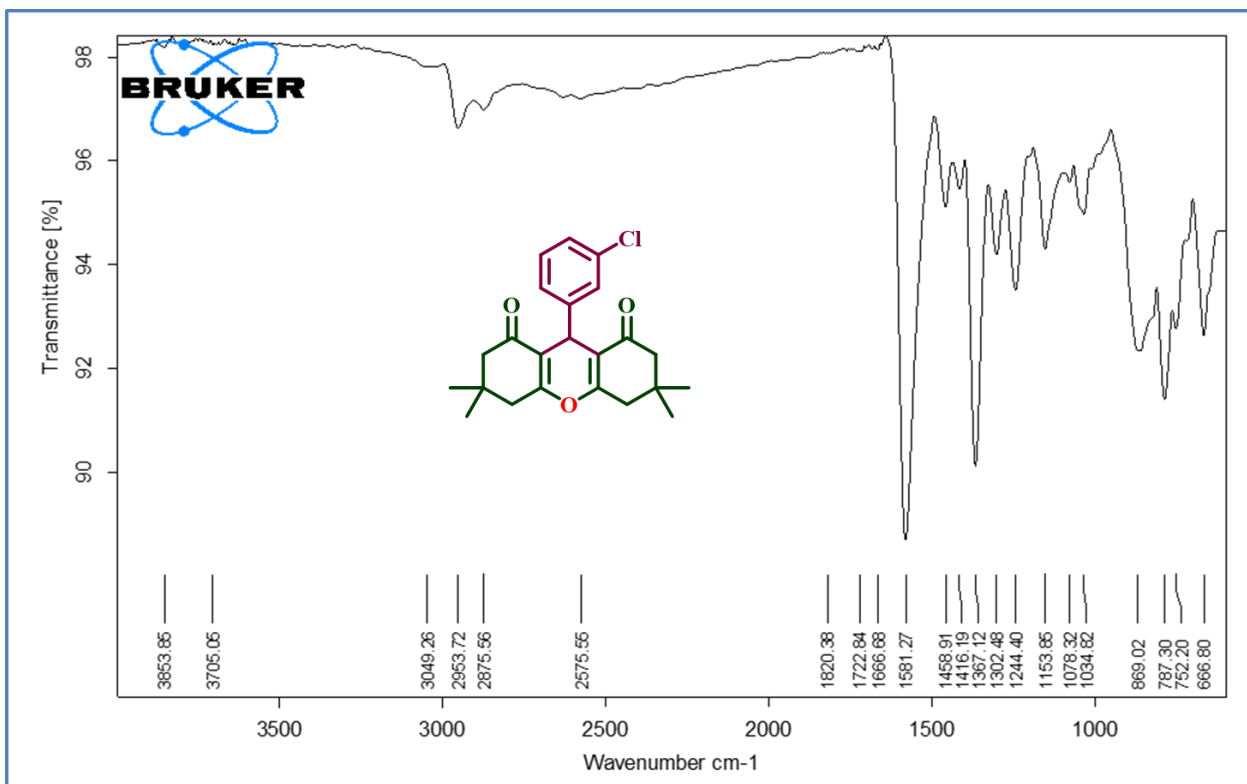



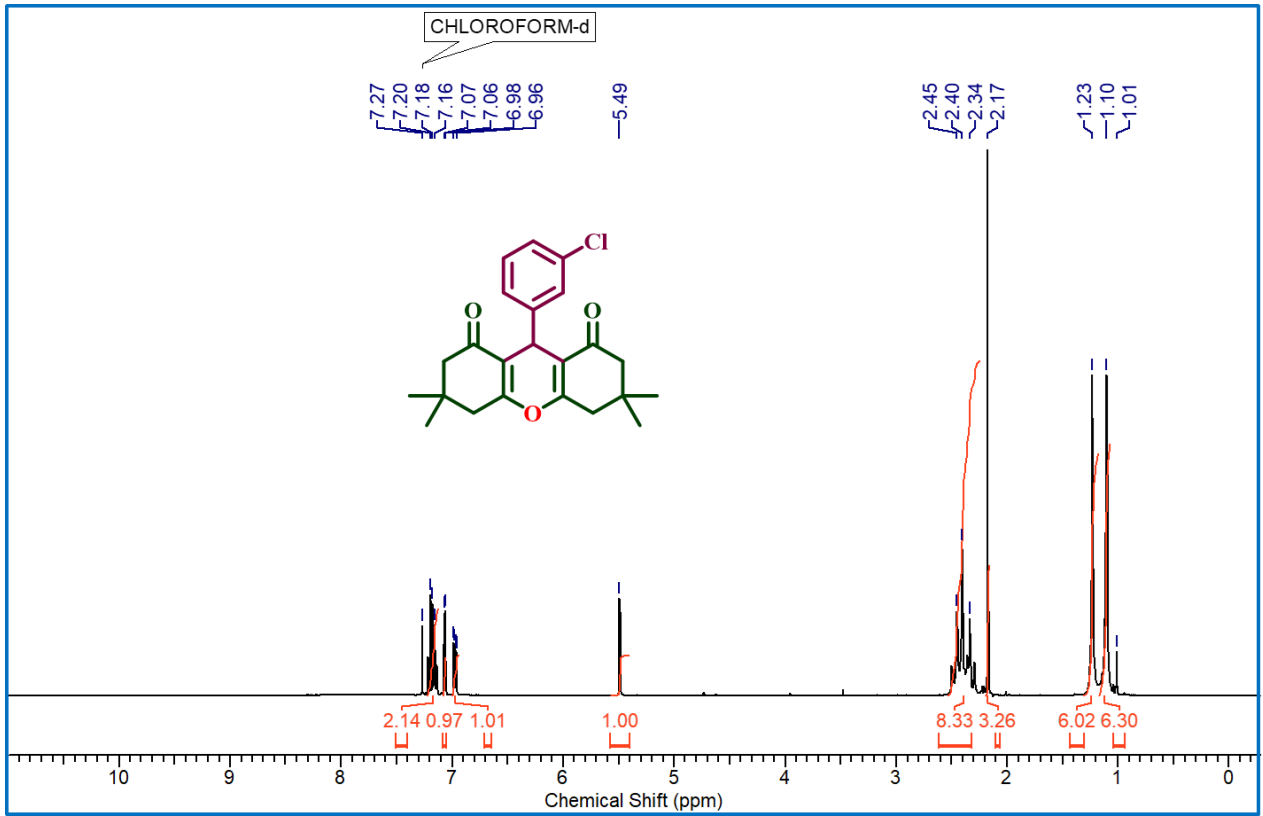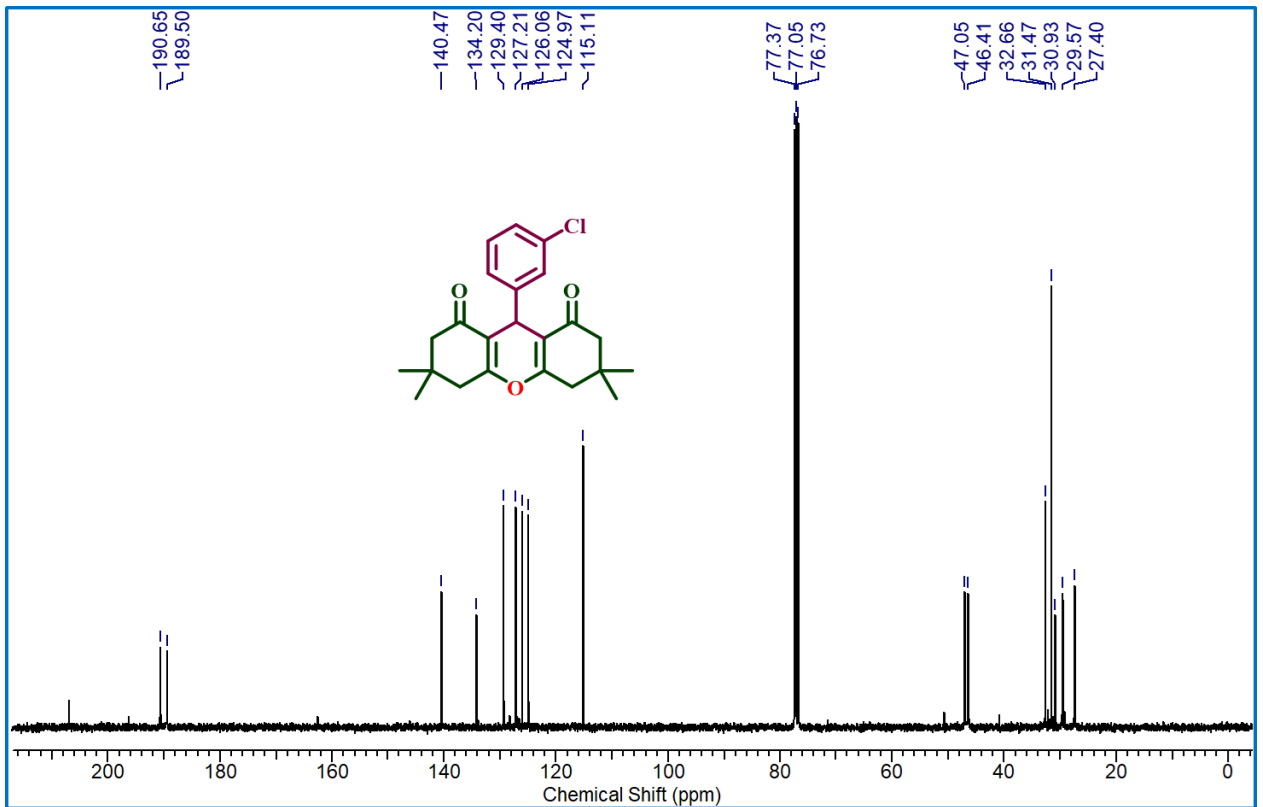

**3,3,6,6-tetramethyl-9-phenyl-3,4,6,7,9,10-hexahydroacridine-1,8(2H,5H)-dione (4a).**

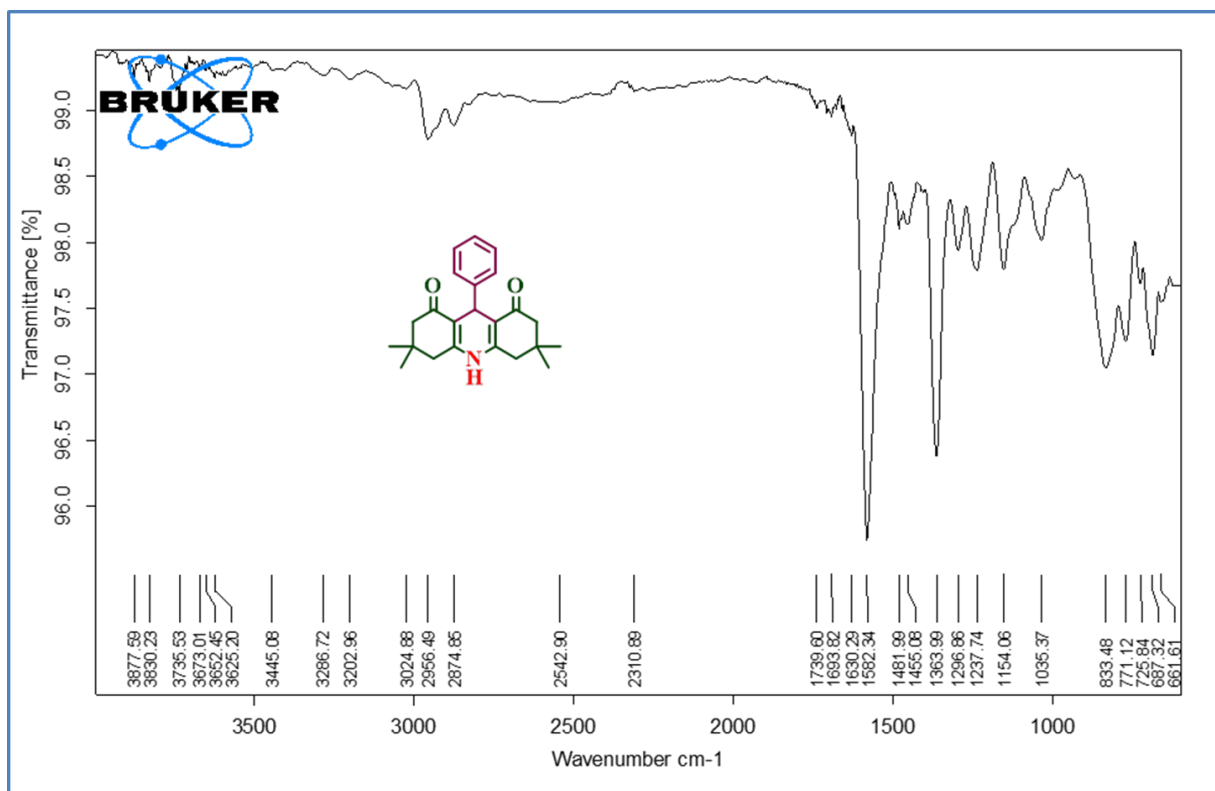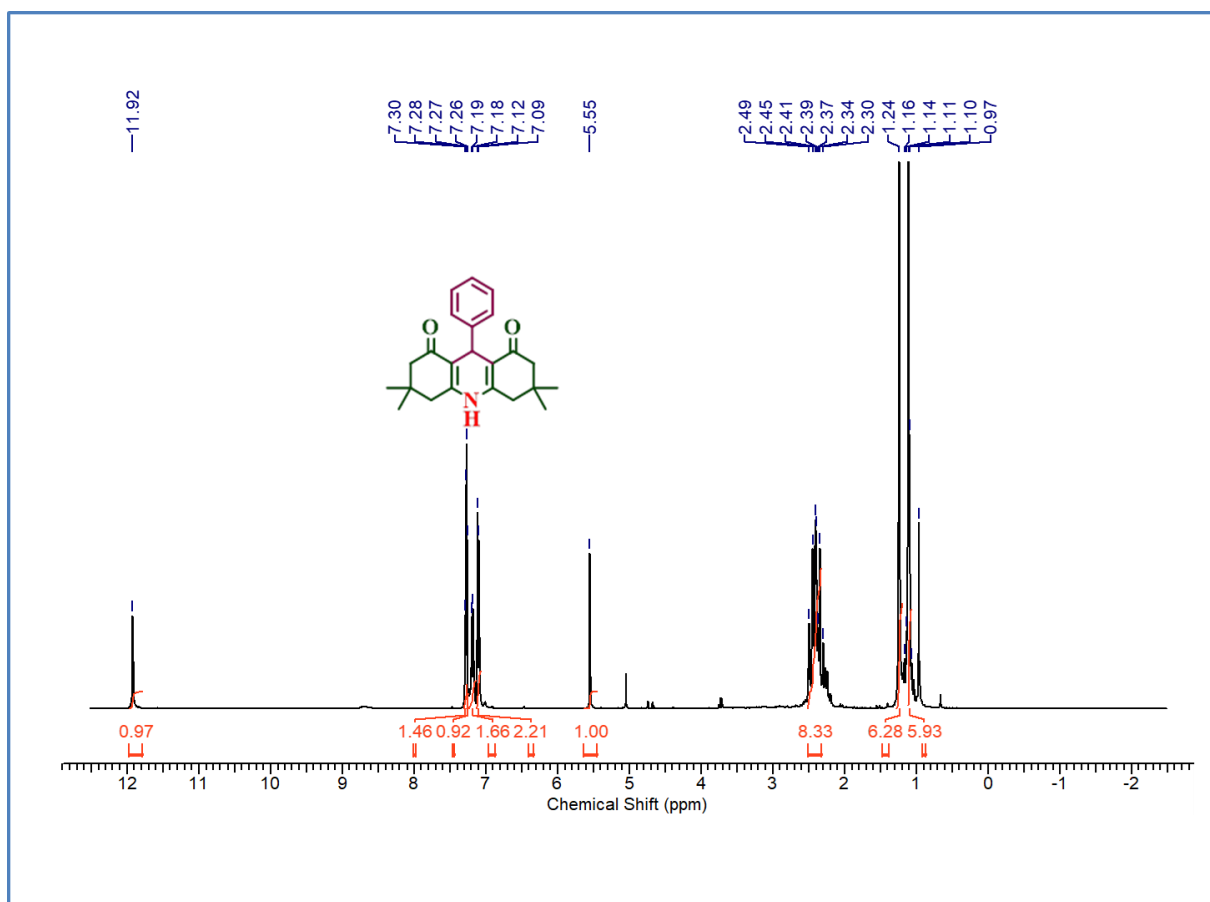

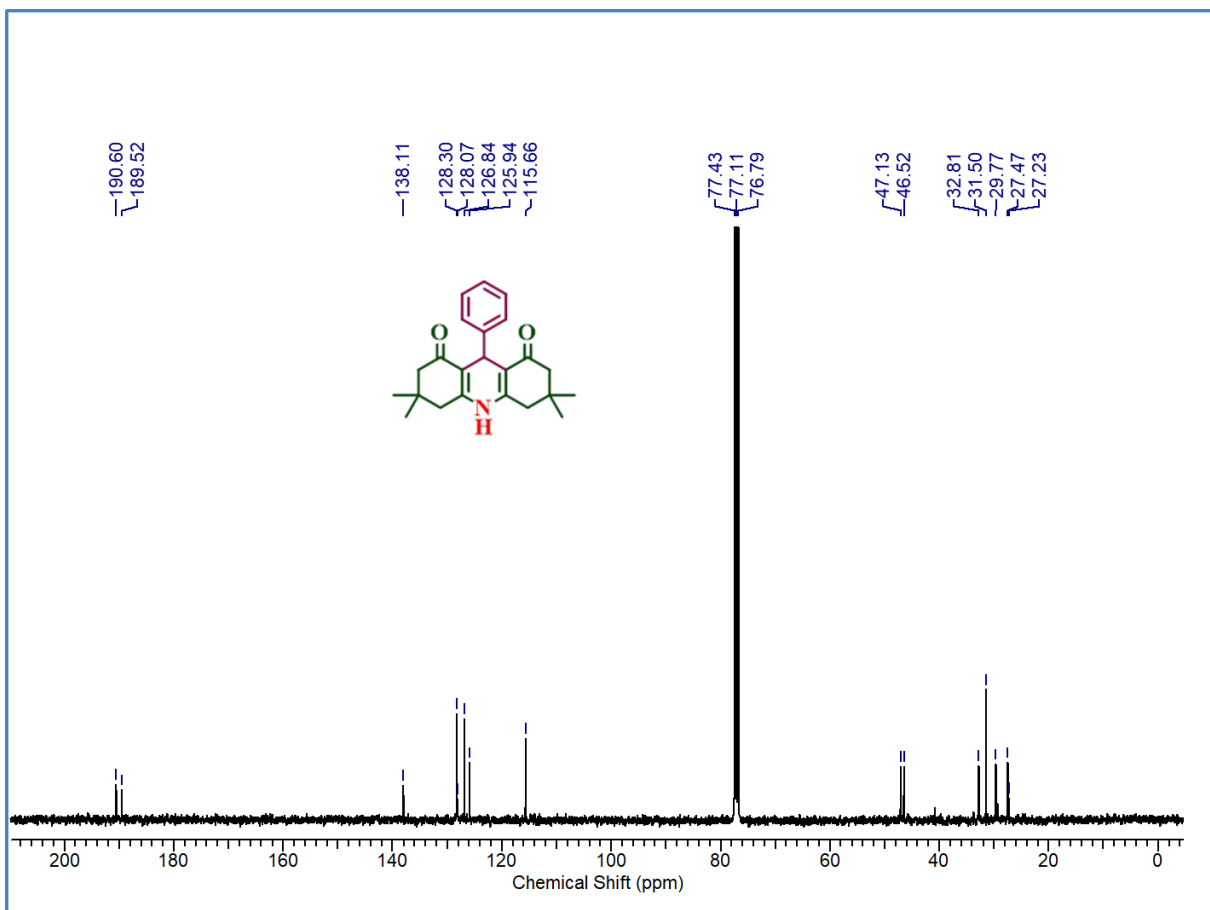

9-(4-chlorophenyl)-3,3,6,6-tetramethyl-3,4,6,7,9,10-hexahydroacridine-1,8(2H,5H)-dione (4b).

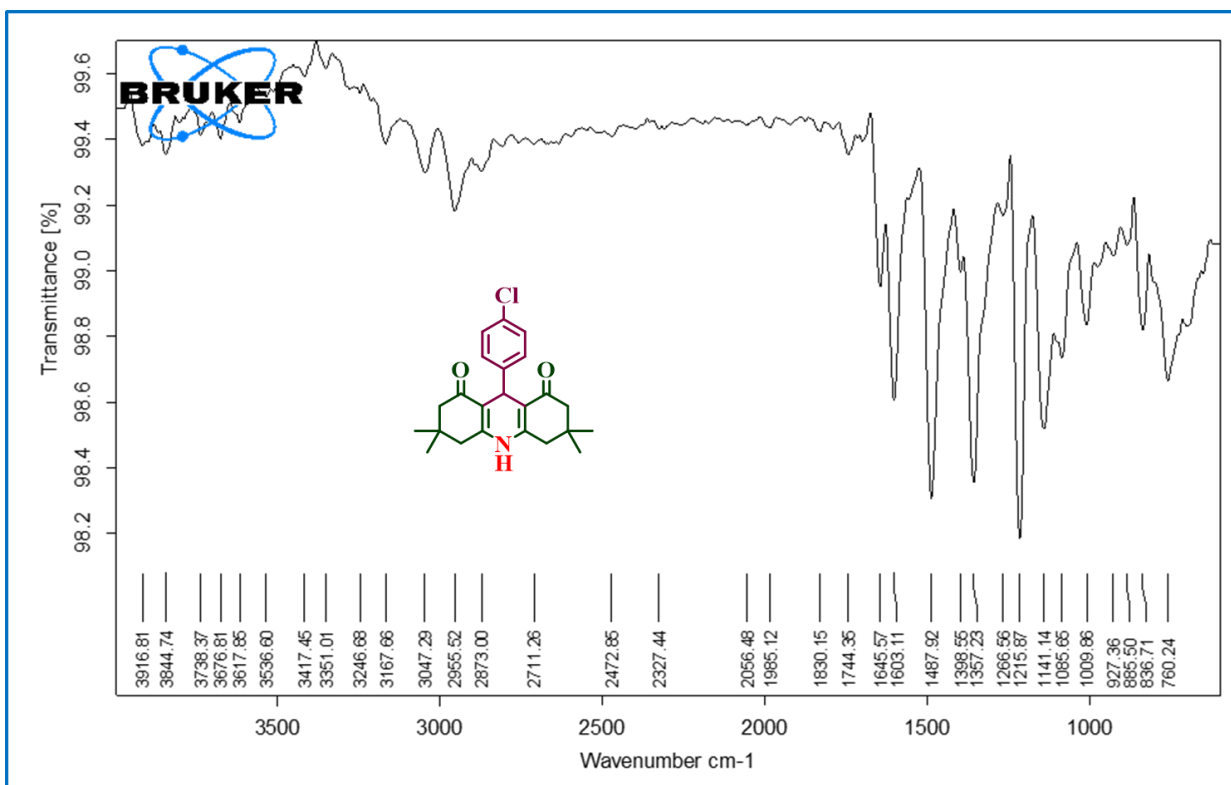

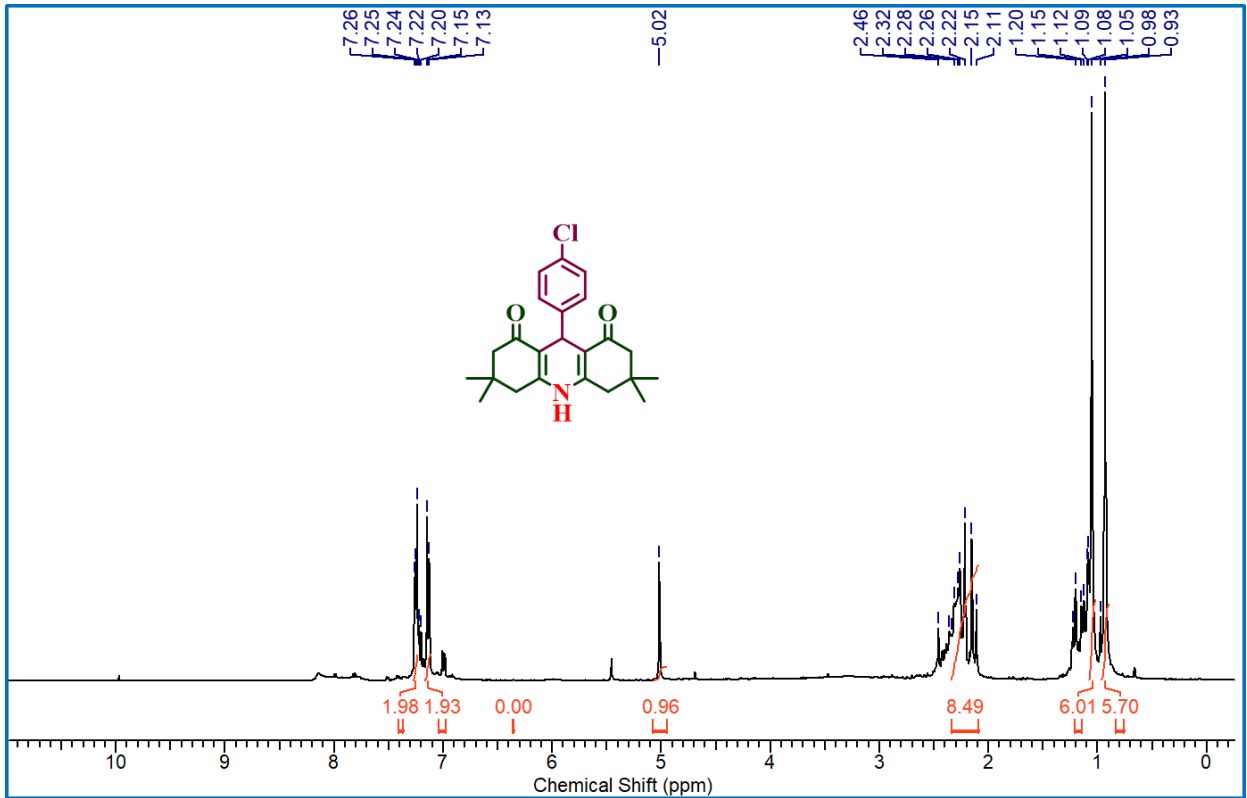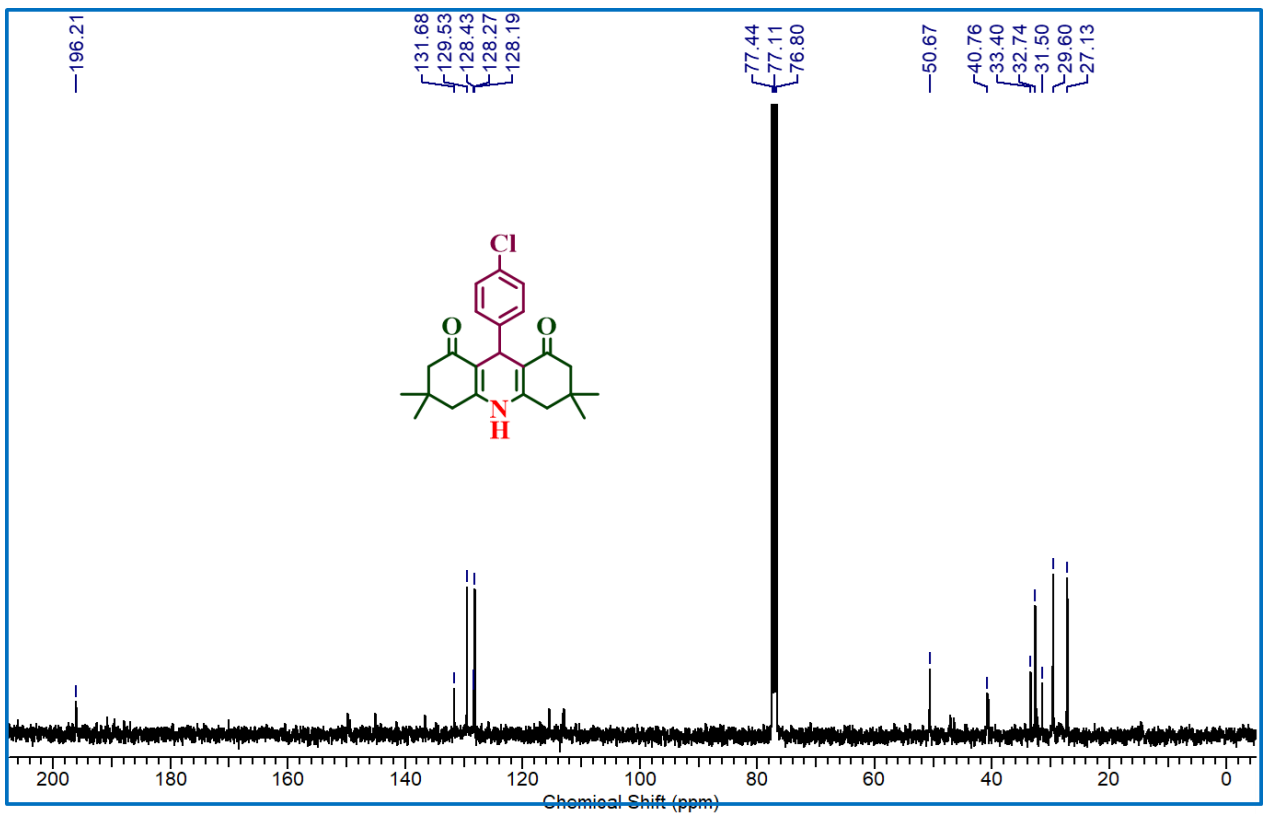

3,3,6,6-tetramethyl-9-(4-nitrophenyl)-3,4,6,7,9,10-hexahydroacridine-1,8(2H,5H)-dione

(4c).

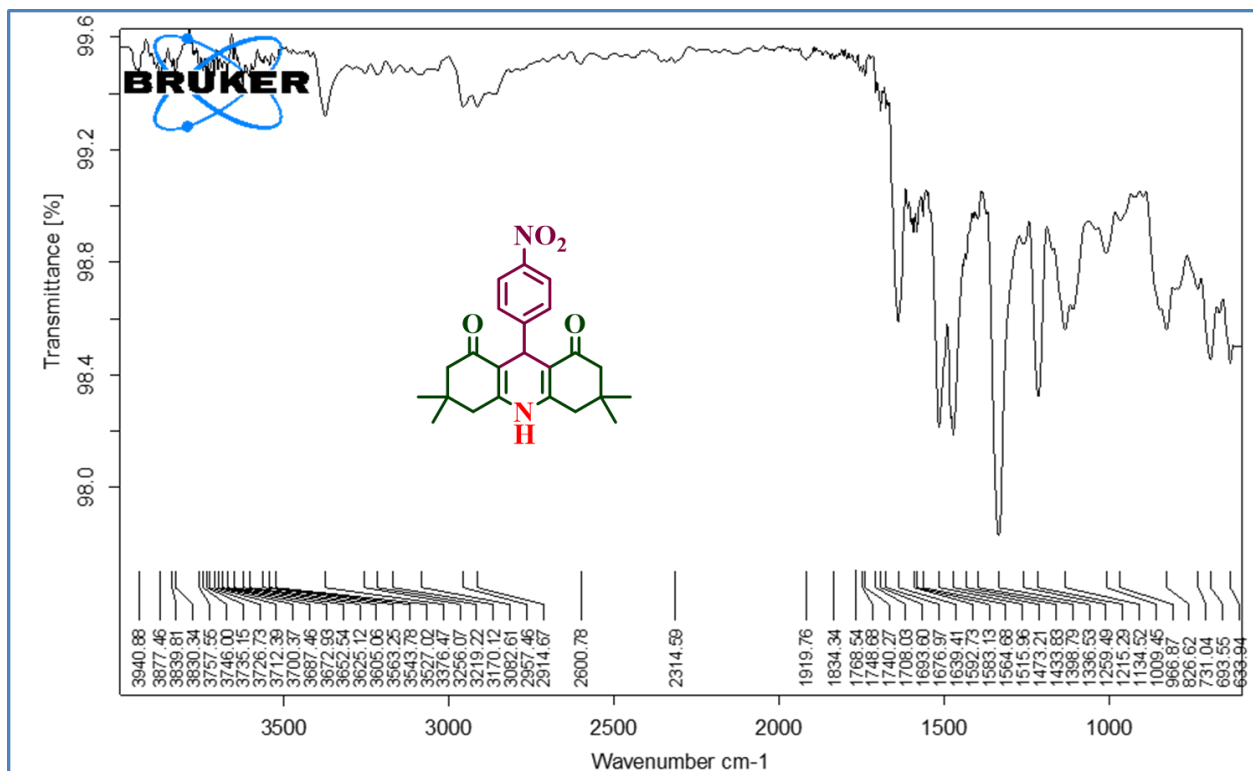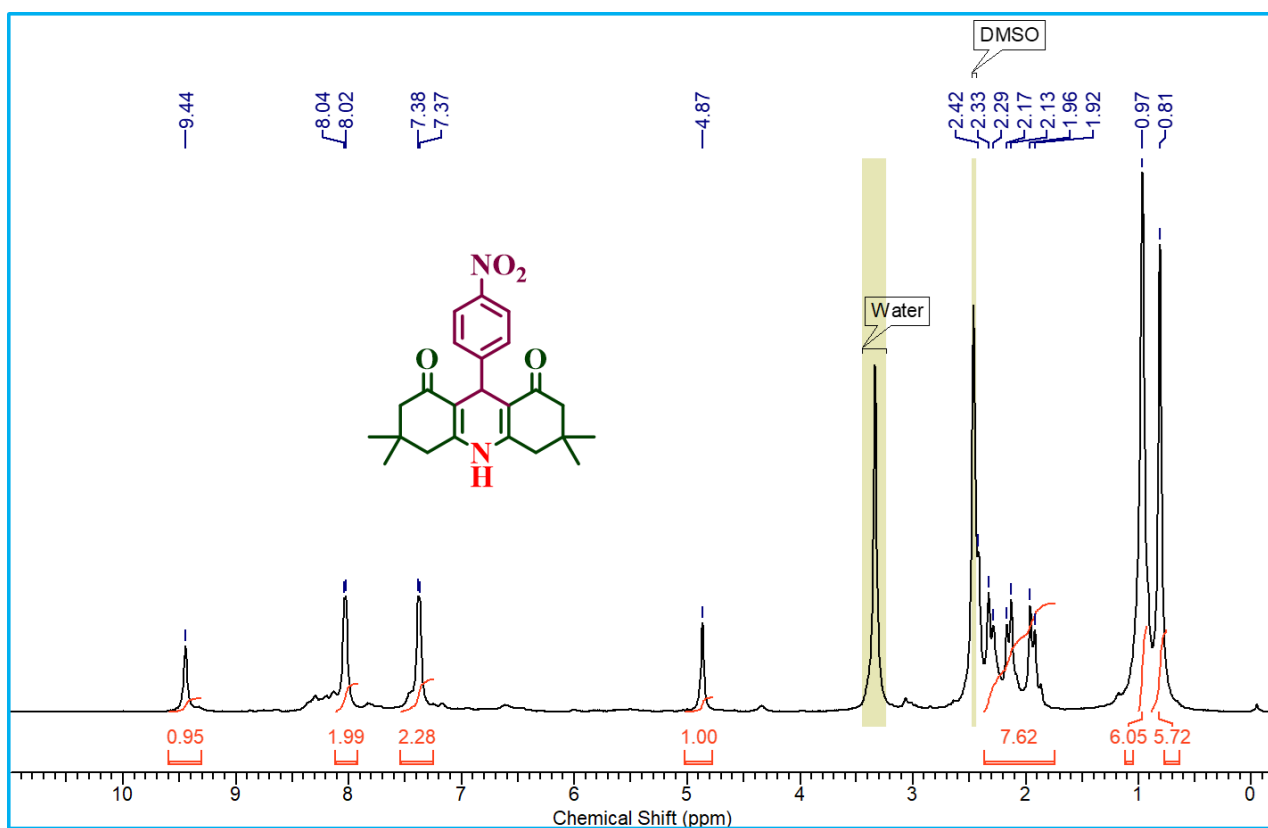

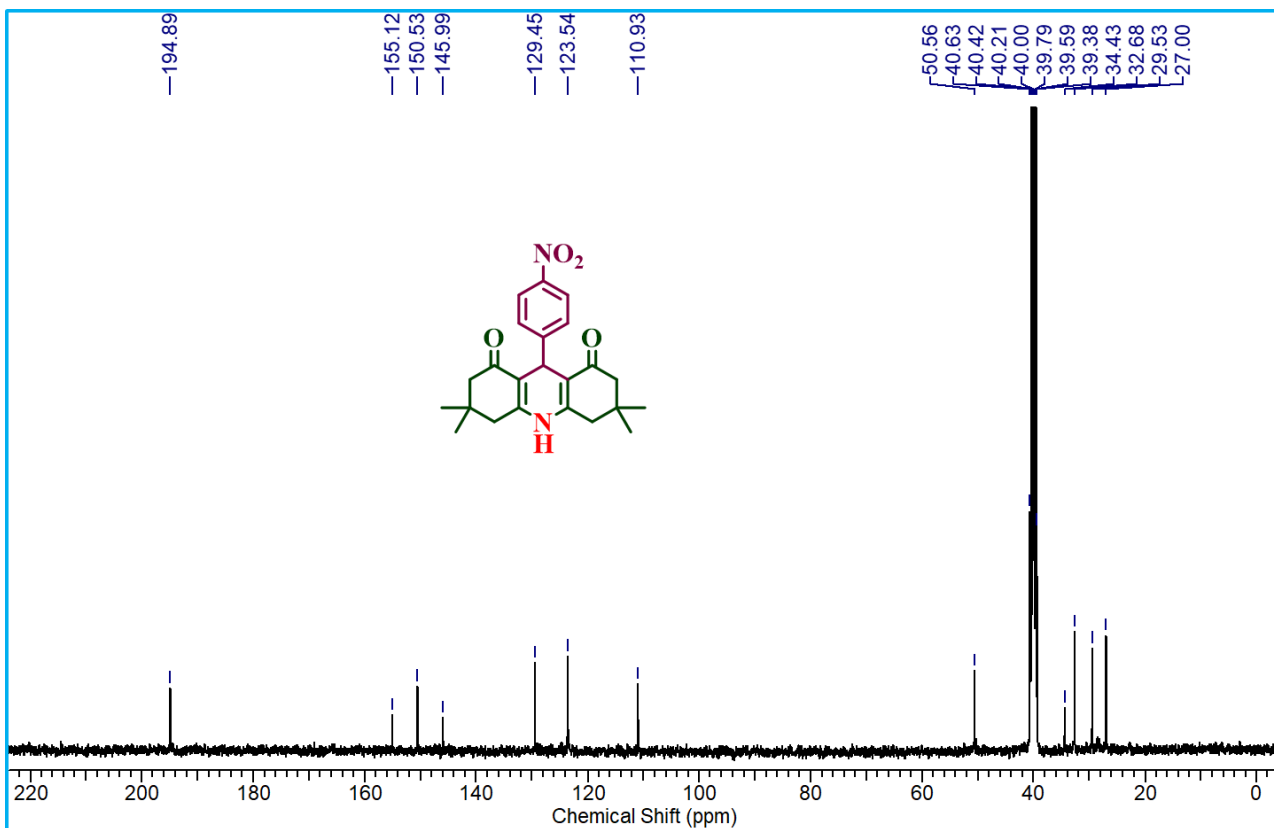

**3,3,6,6-tetramethyl-9-(3-nitrophenyl)-3,4,6,7,9,10-hexahydroacridine-1,8(2H,5H)-dione (4e).**

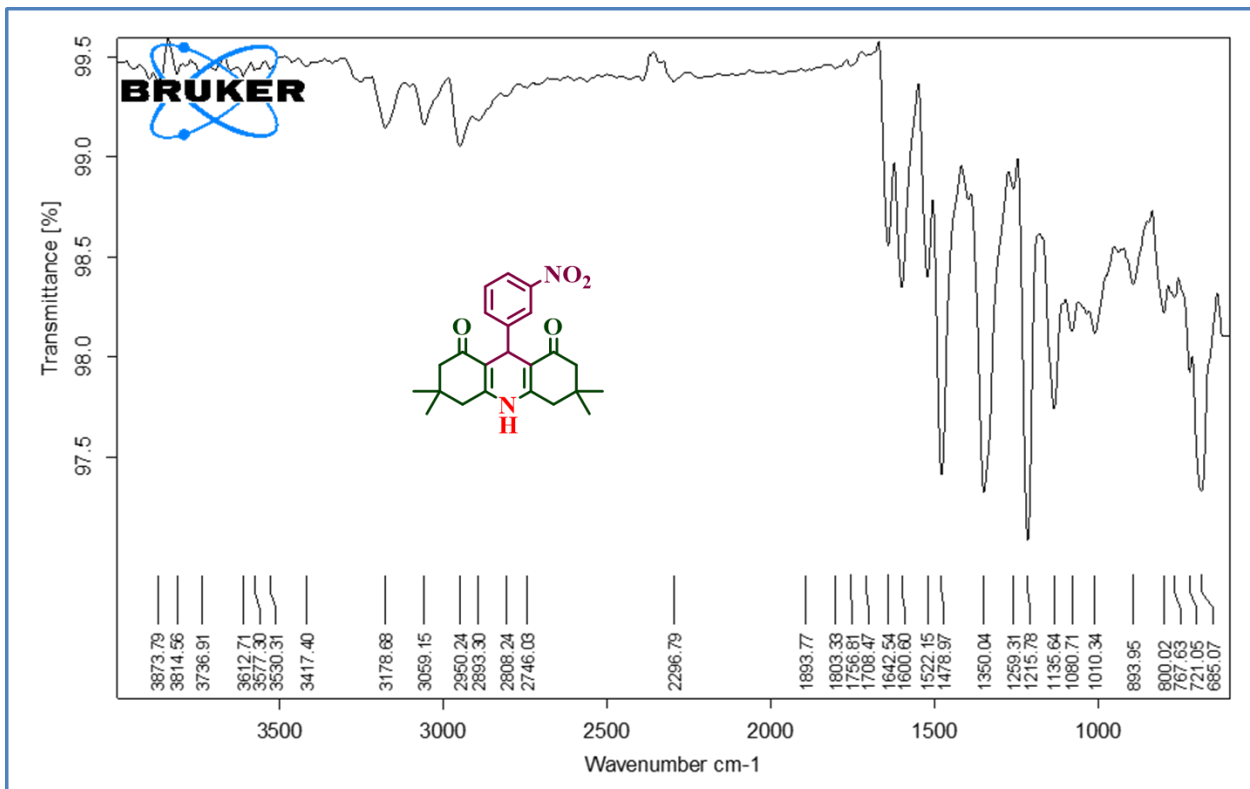

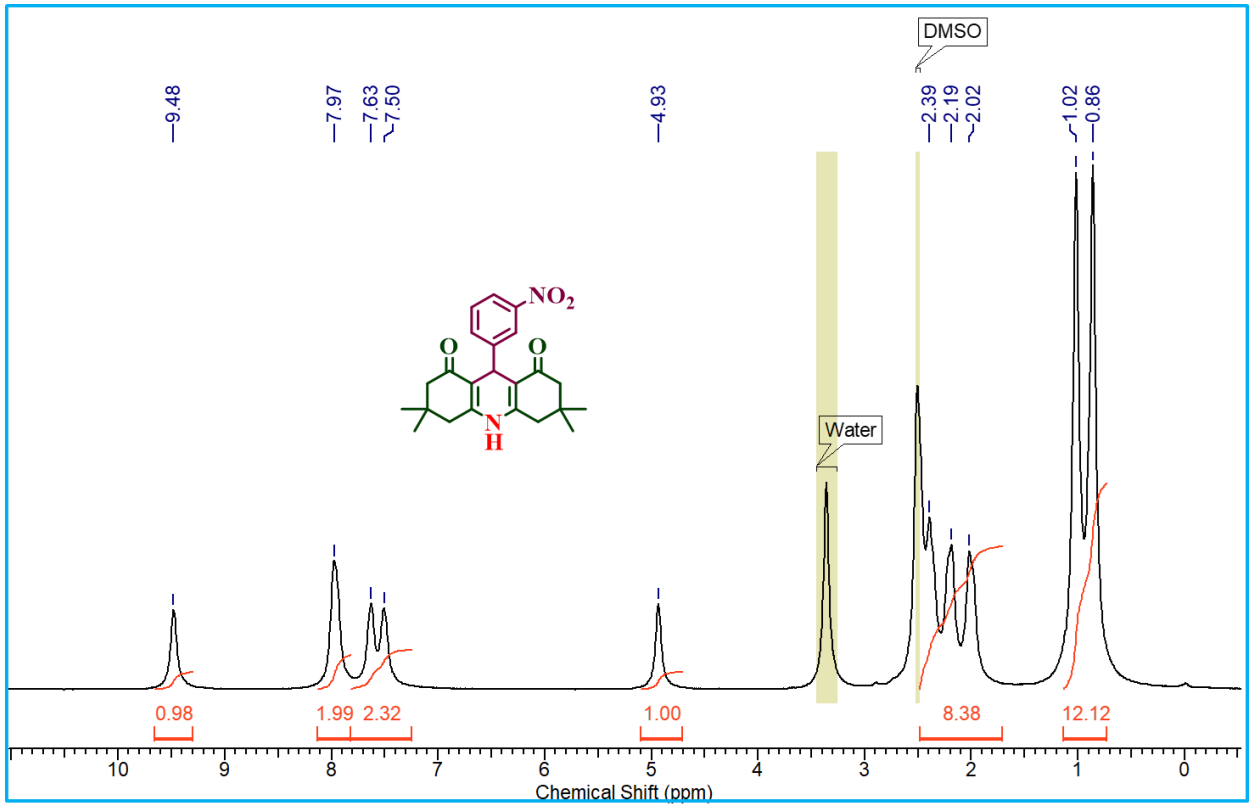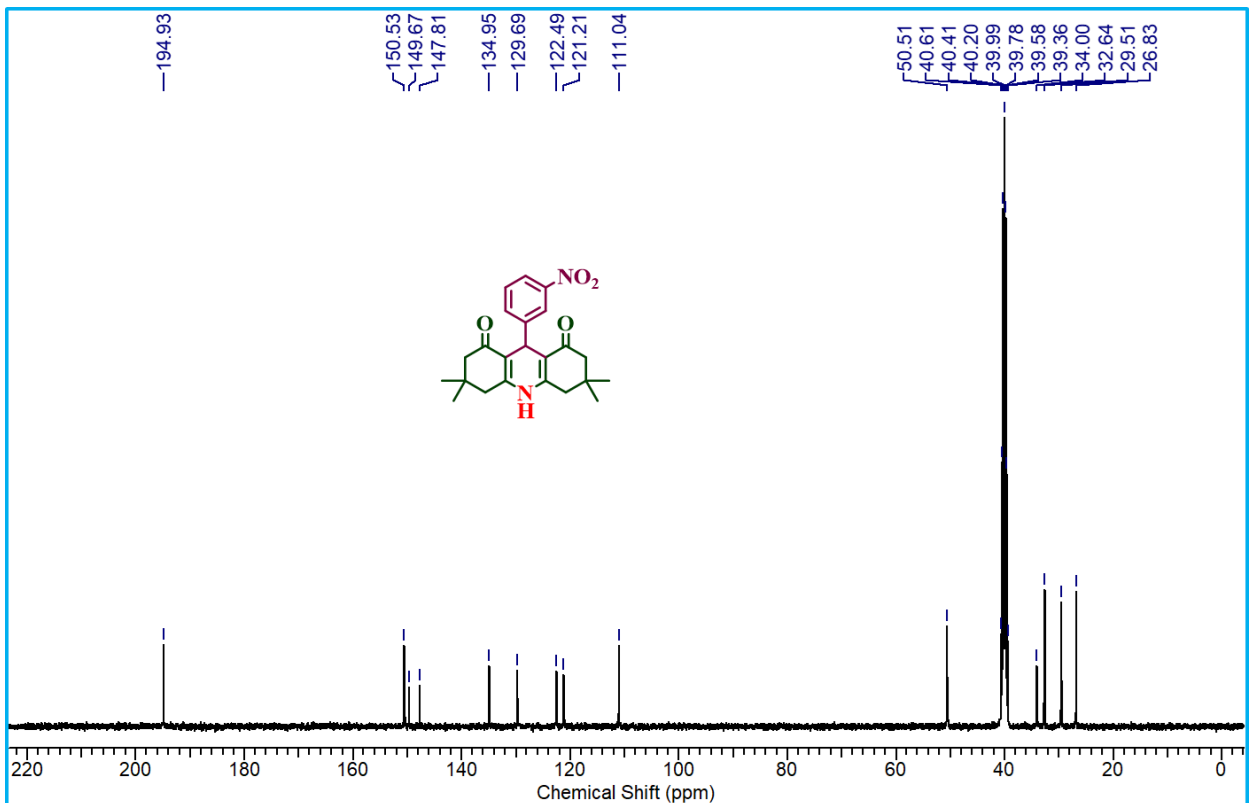

**9-(3-chlorophenyl)-3,3,6,6-tetramethyl-3,4,6,7,9,10-hexahydroacridine-1,8(2H,5H)-dione (4g).**

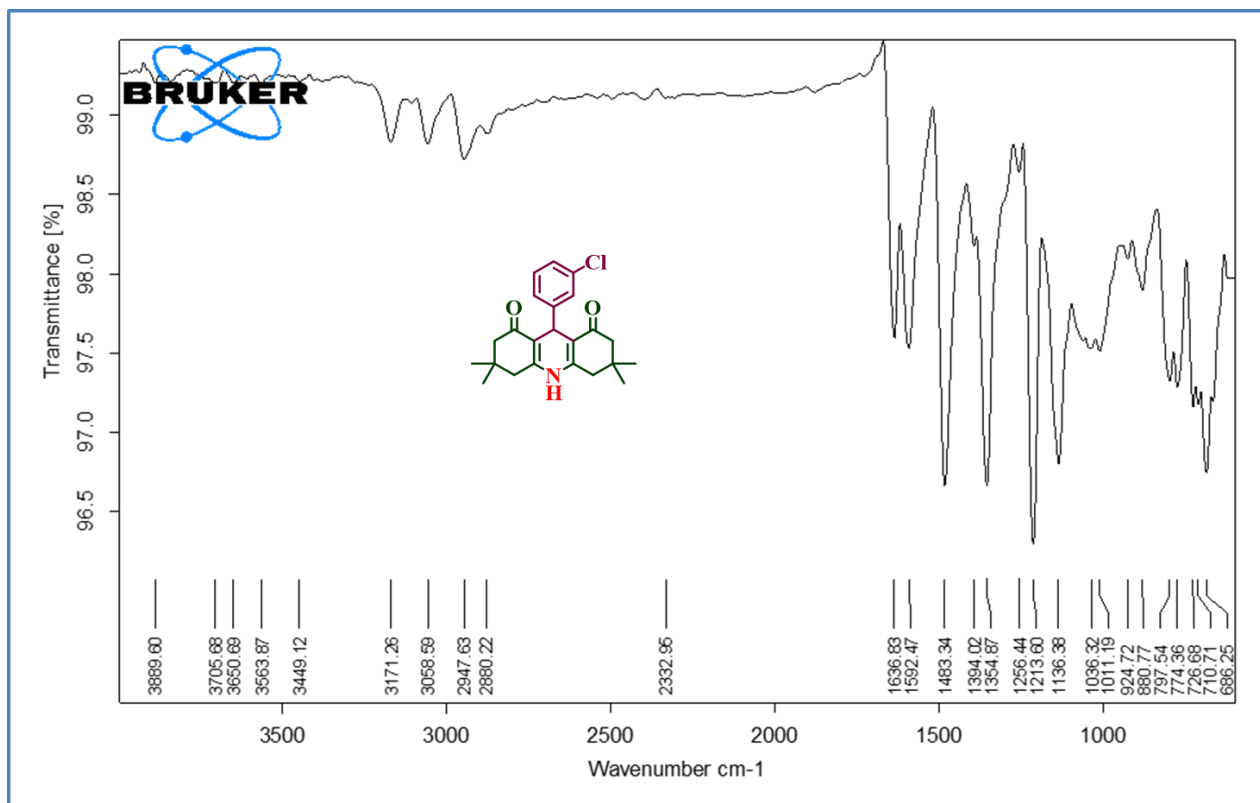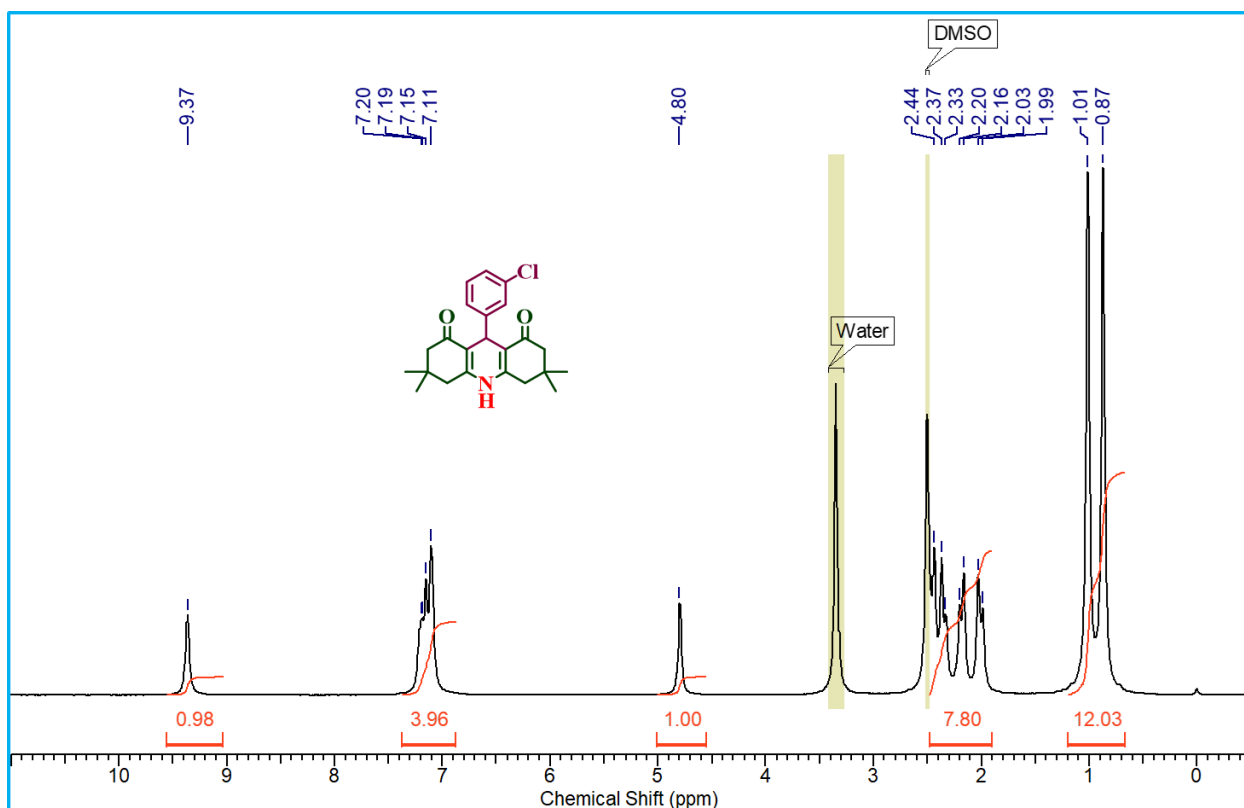



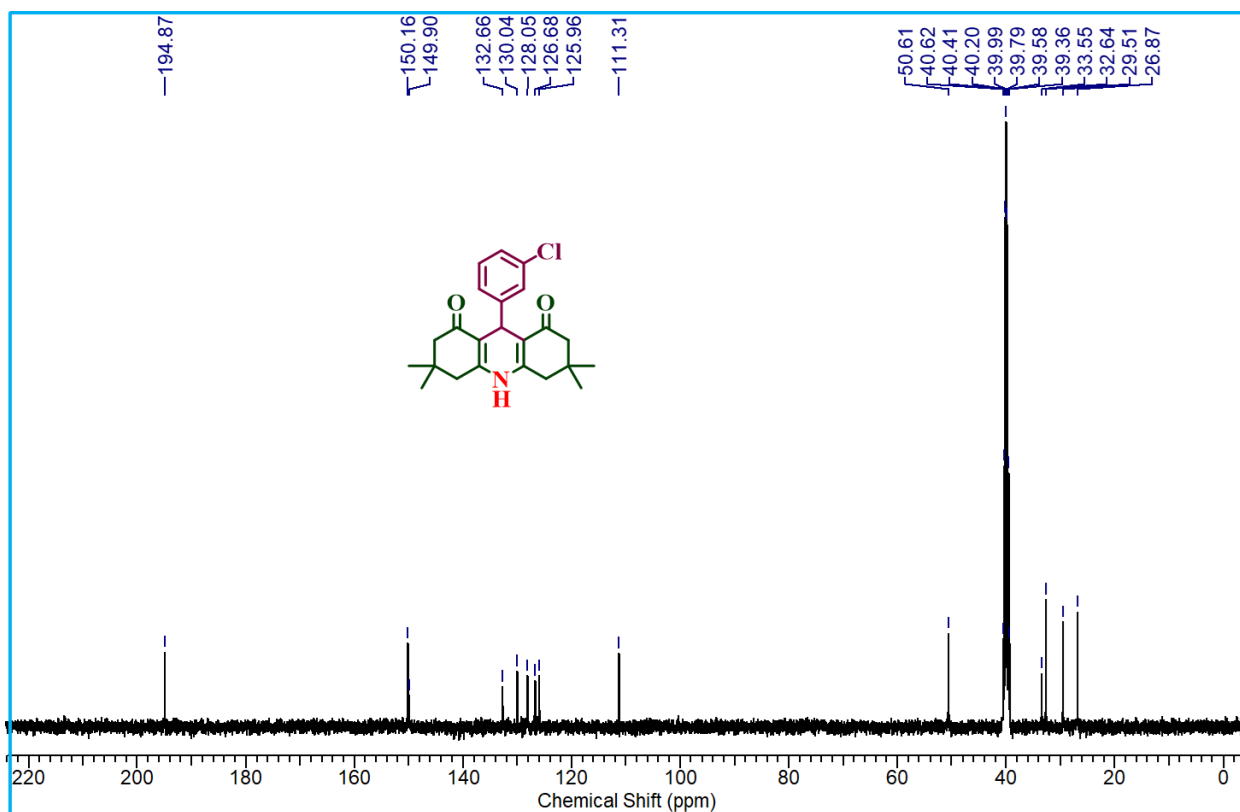

**9-(3-bromophenyl)-3,3,6,6-tetramethyl-3,4,6,7,9,10-hexahydroacridine-1,8(2H,5H)-dione (4h)**

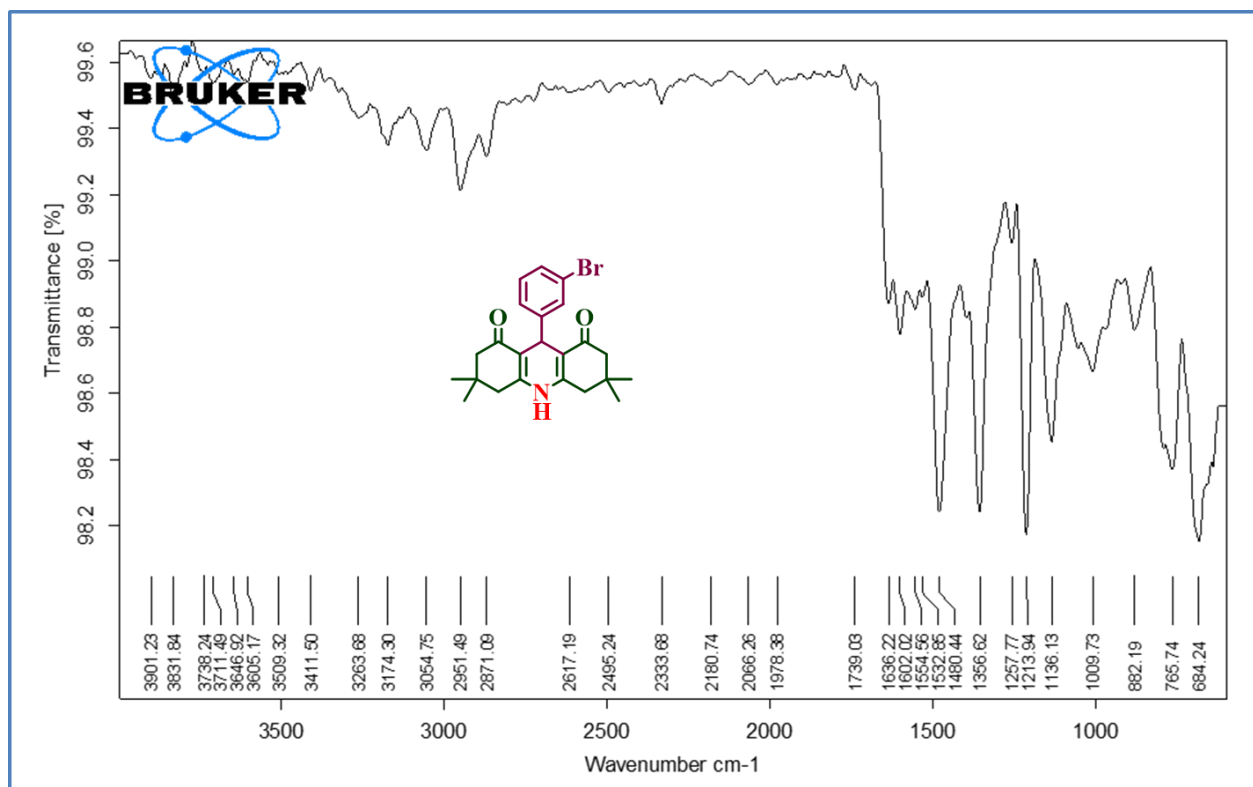

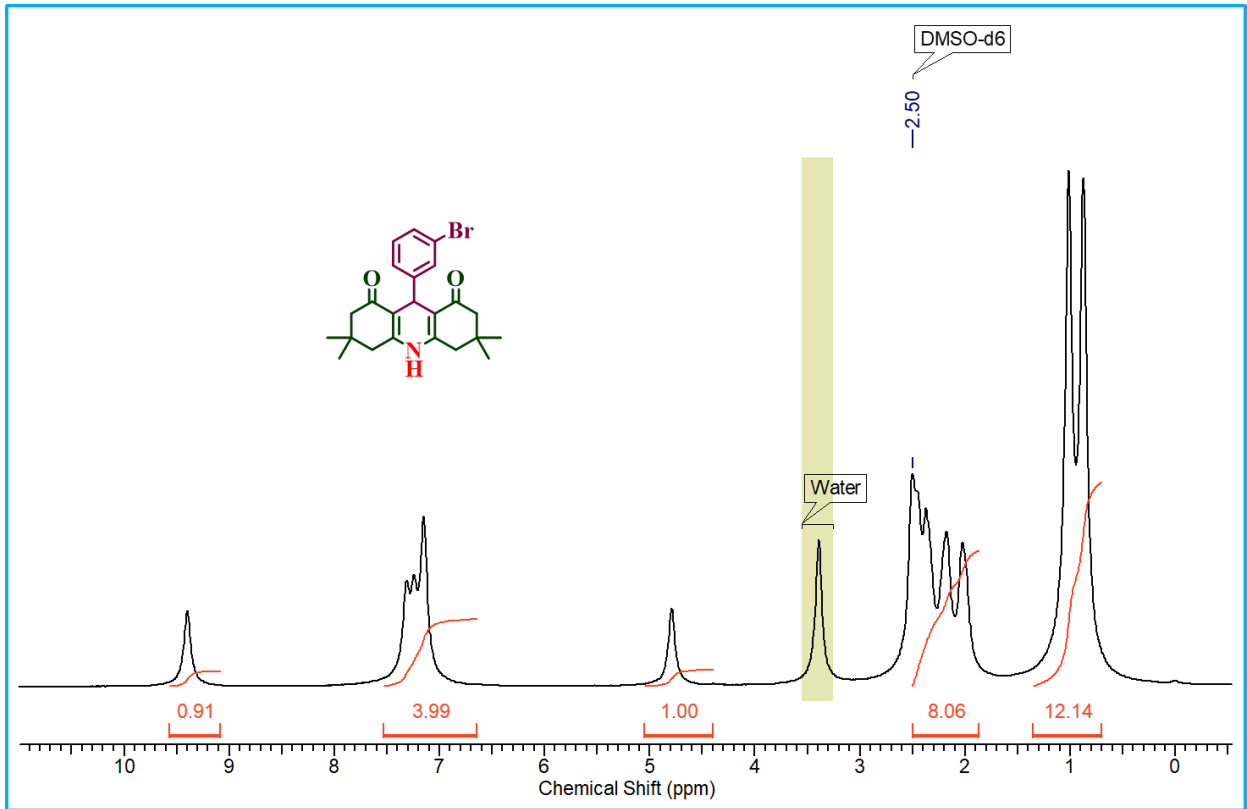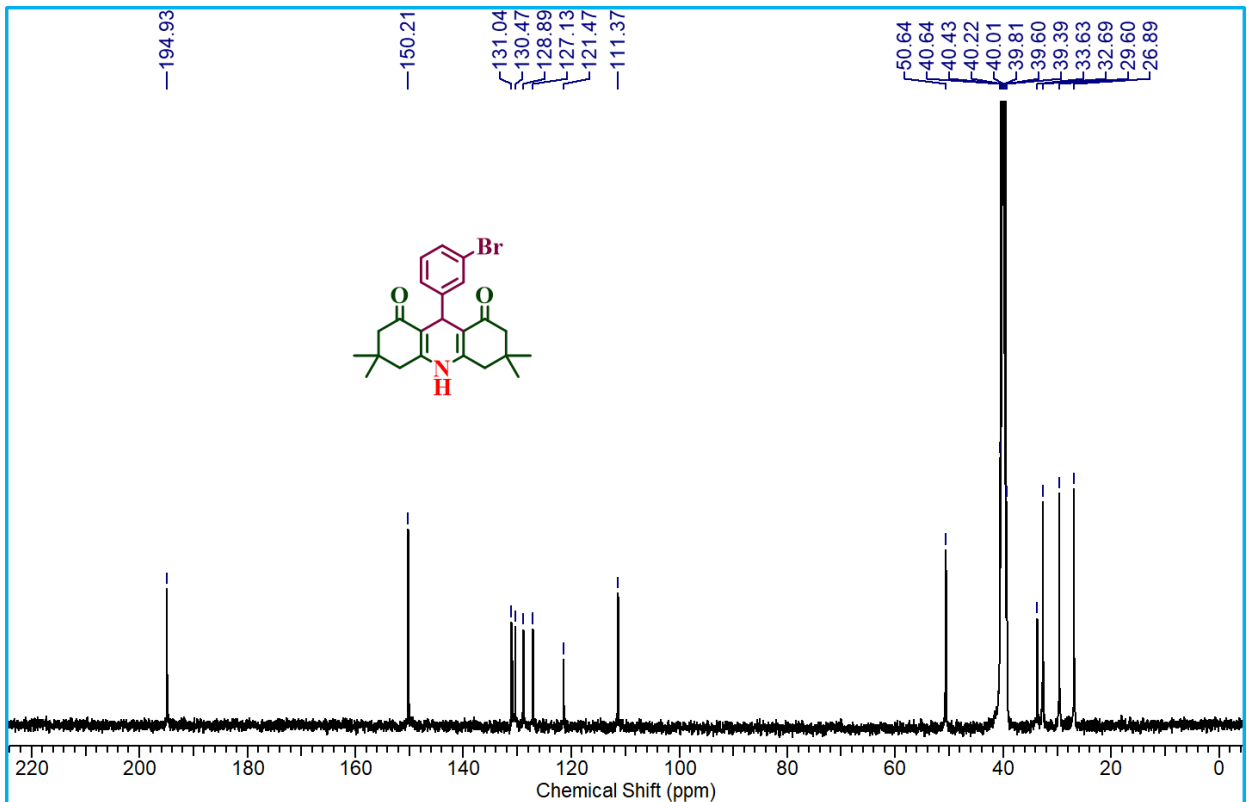

Supplement: d1ra01179k1.pdf [file d1ra01179k1.pdf]
